# Supplementary material for: NF-κB subunits direct kinetically distinct transcriptional cascades in antigen receptor-activated B cells
Source: PubMed Central journal article supplement (PMC10457194; doi:10.1038/s41590-023-01561-7), 2023-07-31

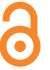

---

# NF- $\kappa$ B subunits direct kinetically distinct transcriptional cascades in antigen receptor-activated B cells

---

In the format provided by the authors and unedited

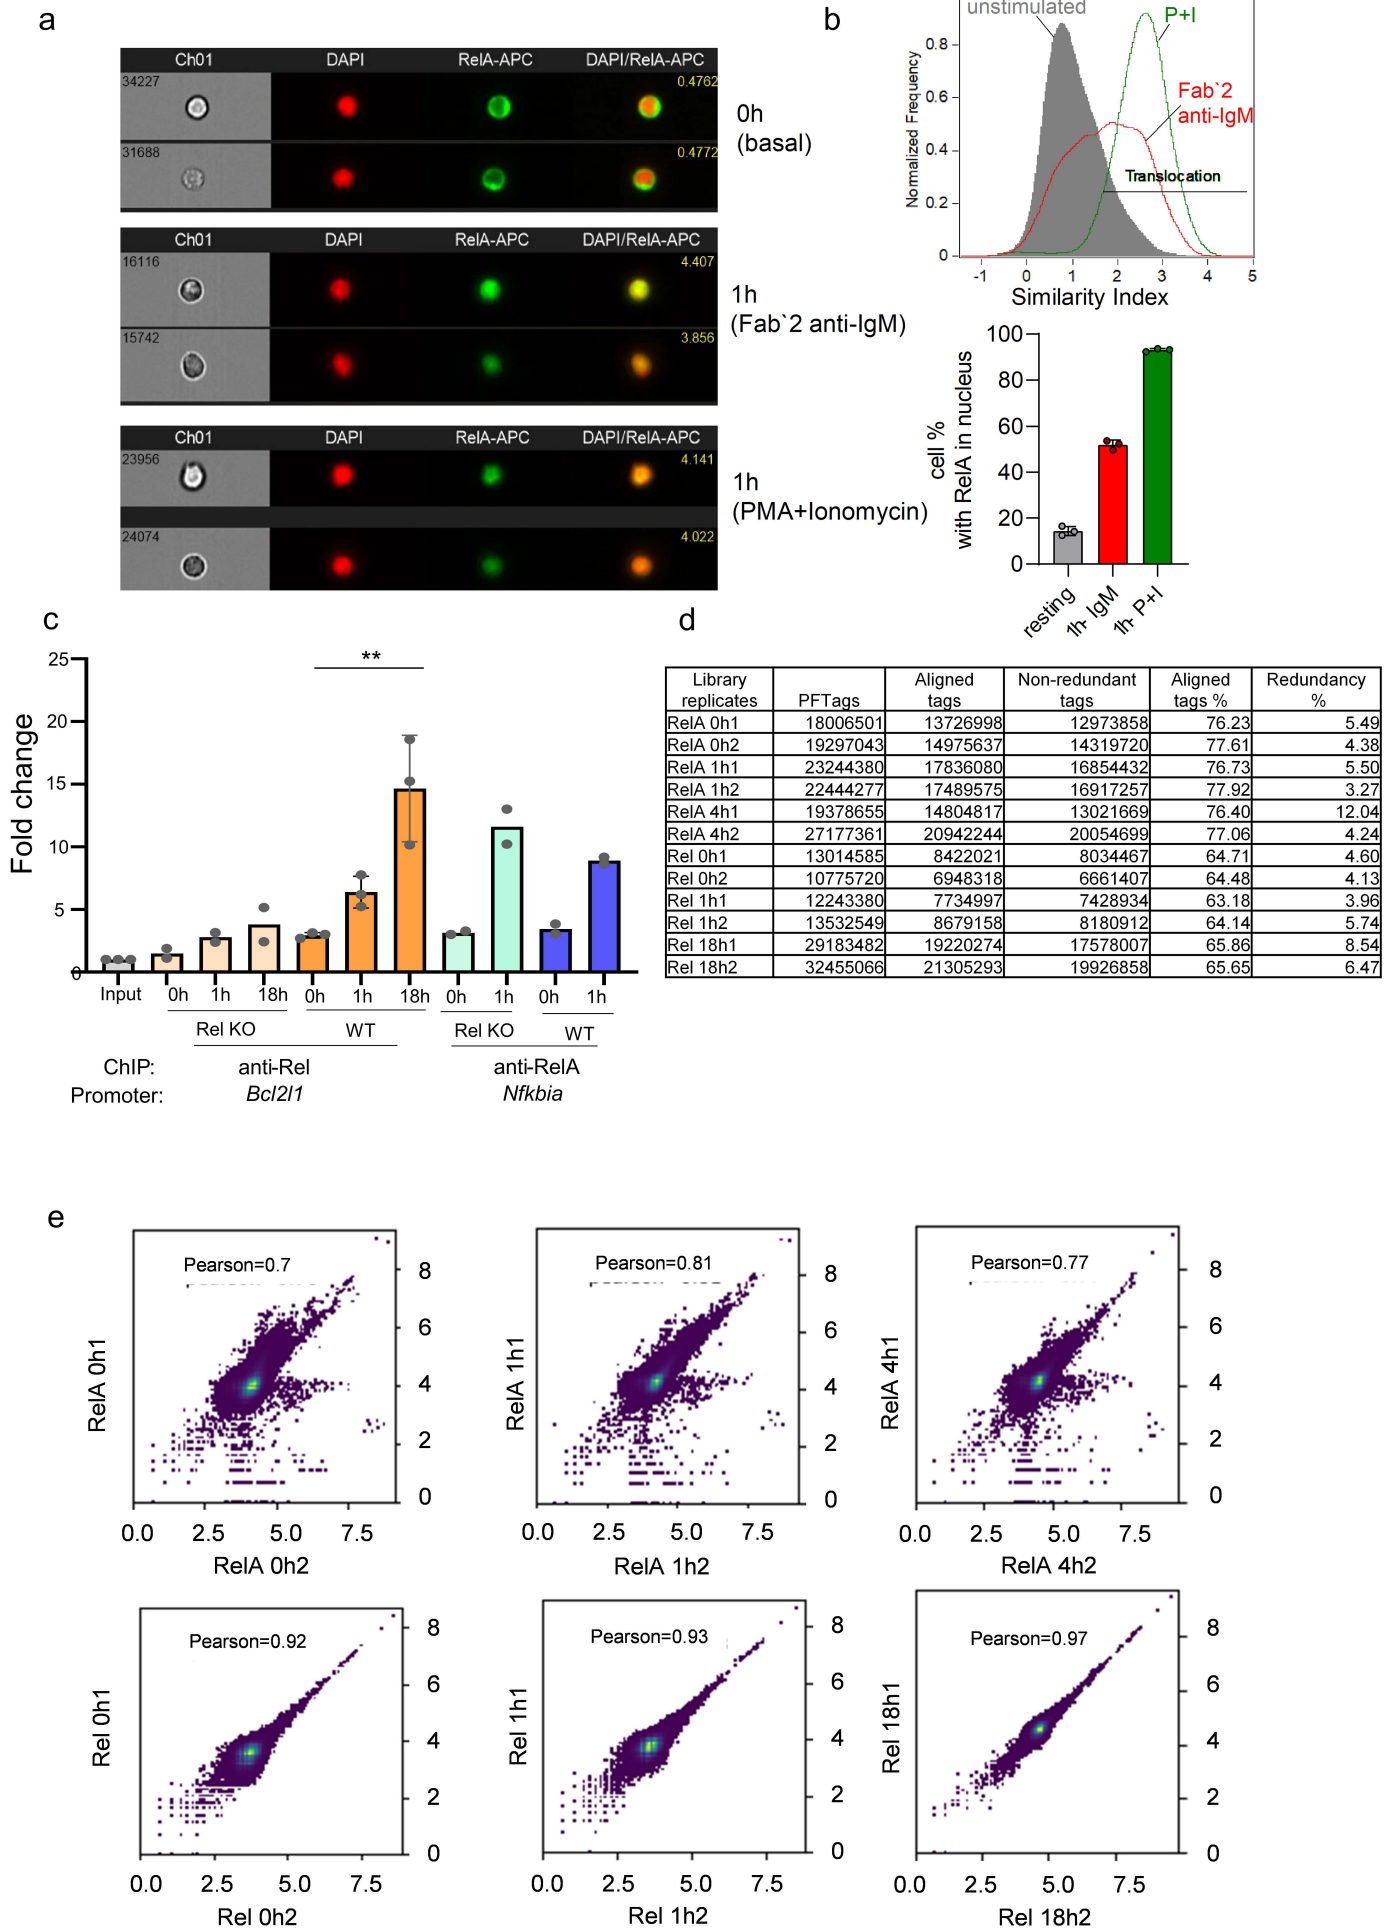

f

| Rank | Motif | P-value | log P-pvalue | % of Targets | % of Background | STD(Bg STD)     | Best Match Details                                                                                                                      |
|------|-------|---------|--------------|--------------|-----------------|-----------------|-----------------------------------------------------------------------------------------------------------------------------------------|
| 1    |       | 1e-13   | -3.137e+01   | 44.07%       | 21.84%          | 54.0bp (71.6bp) | RELB/MA1117.1/Jaspar(0.825)<br><a href="#">More Information</a>   <a href="#">Similar Motifs Found</a>                                  |
| 2    |       | 1e-13   | -3.107e+01   | 2.12%        | 0.00%           | 29.3bp (29.9bp) | RUNX-AML(Runt)CD4+-Poli-ChIP-Seq(Barski_et_al./Homer(0.736))<br><a href="#">More Information</a>   <a href="#">Similar Motifs Found</a> |
| 3    |       | 1e-13   | -3.042e+01   | 8.90%        | 0.99%           | 56.5bp (66.8bp) | Sp1B(ETS)OCILY3-SPIB-ChIP-Seq(GSE56857)/Homer(0.721)<br><a href="#">More Information</a>   <a href="#">Similar Motifs Found</a>         |
| 4    |       | 1e-12   | -2.823e+01   | 6.36%        | 0.46%           | 63.9bp (63.2bp) | MF0003.1_REL_class/Jaspar(0.954)<br><a href="#">More Information</a>   <a href="#">Similar Motifs Found</a>                             |

RelA 0h

| Rank | Motif | P-value | log P-pvalue | % of Targets | % of Background | STD(Bg STD)     | Best Match Details                                                                                                                        |
|------|-------|---------|--------------|--------------|-----------------|-----------------|-------------------------------------------------------------------------------------------------------------------------------------------|
| 1    |       | 1e-168  | -3.870e+02   | 30.75%       | 13.42%          | 53.8bp (61.8bp) | PB0058.1_Sfp1_1/Jaspar(0.951)<br><a href="#">More Information</a>   <a href="#">Similar Motifs Found</a>                                  |
| 2    |       | 1e-157  | -3.626e+02   | 11.02%       | 2.19%           | 50.6bp (61.1bp) | NFKB-p65(RHD)/GM12787-p65-ChIP-Seq(GSE19485)/Homer(0.949)<br><a href="#">More Information</a>   <a href="#">Similar Motifs Found</a>      |
| 3    |       | 1e-08   | -1.584e+02   | 2.80%        | 0.27%           | 51.4bp (65.1bp) | PU.1-IRF8(ETS-IRF)pDC-IrF8-ChIP-Seq(GSE66899)/Homer(0.939)<br><a href="#">More Information</a>   <a href="#">Similar Motifs Found</a>     |
| 4    |       | 1e-43   | -1.004e+02   | 3.53%        | 0.80%           | 54.8bp (60.5bp) | RUNX1(Runt)Jurkat-RUNX1-ChIP-Seq(GSE29180)/Homer(0.764)<br><a href="#">More Information</a>   <a href="#">Similar Motifs Found</a>        |
| 5    |       | 1e-39   | -9.017e+01   | 5.08%        | 1.68%           | 52.7bp (55.0bp) | EBF(EBF)/proBcell-EBF-ChIP-Seq(GSE21978)/Homer(0.897)<br><a href="#">More Information</a>   <a href="#">Similar Motifs Found</a>          |
| 6    |       | 1e-37   | -8.722e+01   | 2.80%        | 0.58%           | 56.0bp (55.0bp) | Oct4(POU/Homeobox)mES-Oct4-ChIP-Seq(GSE11431)/Homer(0.985)<br><a href="#">More Information</a>   <a href="#">Similar Motifs Found</a>     |
| 7    |       | 1e-37   | -8.628e+01   | 11.15%       | 5.72%           | 55.0bp (58.7bp) | BATF(bZIP)Th17-BATF-ChIP-Seq(GSE39756)/Homer(0.967)<br><a href="#">More Information</a>   <a href="#">Similar Motifs Found</a>            |
| 8    |       | 1e-37   | -8.534e+01   | 14.58%       | 8.31%           | 55.3bp (63.1bp) | ERG(ETS)VCaP-ERG-ChIP-Seq(GSE14097)/Homer(0.787)<br><a href="#">More Information</a>   <a href="#">Similar Motifs Found</a>               |
| 9    |       | 1e-27   | -6.445e+01   | 17.12%       | 11.10%          | 53.4bp (62.4bp) | USF1/MA0093.2/Jaspar(0.952)<br><a href="#">More Information</a>   <a href="#">Similar Motifs Found</a>                                    |
| 10   |       | 1e-23   | -5.354e+01   | 29.05%       | 22.08%          | 56.9bp (64.4bp) | Rbpl1(?)Panc1-Rbpl1-ChIP-Seq(GSE47459)/Homer(0.782)<br><a href="#">More Information</a>   <a href="#">Similar Motifs Found</a>            |
| 11   |       | 1e-22   | -5.222e+01   | 26.88%       | 20.20%          | 56.5bp (64.2bp) | MeZc(MADS)GM12878-MeZc-ChIP-Seq(GSE32465)/Homer(0.754)<br><a href="#">More Information</a>   <a href="#">Similar Motifs Found</a>         |
| 12   |       | 1e-19   | -4.557e+01   | 0.34%        | 0.01%           | 45.3bp (40.5bp) | ETS-RUNX(ETS_Runt)Jurkat-RUNX1-ChIP-Seq(GSE17954)/Homer(0.881)<br><a href="#">More Information</a>   <a href="#">Similar Motifs Found</a> |
| 13   |       | 1e-17   | -4.059e+01   | 3.74%        | 1.66%           | 56.5bp (57.9bp) | MF0003.1_REL_class/Jaspar(0.672)<br><a href="#">More Information</a>   <a href="#">Similar Motifs Found</a>                               |
| 14   |       | 1e-16   | -3.829e+01   | 0.39%        | 0.02%           | 50.8bp (63.5bp) | PB0141.1_IgF3g_2/Jaspar(0.710)<br><a href="#">More Information</a>   <a href="#">Similar Motifs Found</a>                                 |
| 15   |       | 1e-15   | -3.593e+01   | 9.53%        | 6.13%           | 56.1bp (62.0bp) | CREB1/MA0018.3/Jaspar(0.947)<br><a href="#">More Information</a>   <a href="#">Similar Motifs Found</a>                                   |
| 16   |       | 1e-15   | -3.526e+01   | 2.04%        | 0.70%           | 52.8bp (59.6bp) | MEF2D/MA0773.1/Jaspar(0.885)<br><a href="#">More Information</a>   <a href="#">Similar Motifs Found</a>                                   |
| 17   |       | 1e-14   | -3.365e+01   | 32.56%       | 26.82%          | 55.1bp (61.3bp) | SCL(bHLH)HPC7-Scl-ChIP-Seq(GSE13511)/Homer(0.530)<br><a href="#">More Information</a>   <a href="#">Similar Motifs Found</a>              |
| 18   |       | 1e-13   | -3.137e+01   | 1.83%        | 0.64%           | 60.6bp (62.2bp) | NFAT(RHD)Jurkat-NFATC1-ChIP-Seq(Jolma_et_al./Homer(0.832))<br><a href="#">More Information</a>   <a href="#">Similar Motifs Found</a>     |

RelA 1h

| Rank | Motif | P-value | log P-pvalue | % of Targets | % of Background | STD(Bg STD)     | Best Match Details                                                                                                                            |
|------|-------|---------|--------------|--------------|-----------------|-----------------|-----------------------------------------------------------------------------------------------------------------------------------------------|
| 1    |       | 1e-86   | -1.993e+02   | 20.47%       | 4.81%           | 52.4bp (62.7bp) | NFKB-p65(RHD)/GM12787-p65-ChIP-Seq(GSE19485)/Homer(0.969)<br><a href="#">More Information</a>   <a href="#">Similar Motifs Found</a>          |
| 2    |       | 1e-86   | -1.991e+02   | 36.55%       | 14.24%          | 52.8bp (62.8bp) | PB0058.1_Sfp1_1/Jaspar(0.949)<br><a href="#">More Information</a>   <a href="#">Similar Motifs Found</a>                                      |
| 3    |       | 1e-43   | -1.001e+02   | 6.98%        | 1.03%           | 50.8bp (65.0bp) | PU.1-IRF8(ETS-IRF)pDC-IrF8-ChIP-Seq(GSE66899)/Homer(0.854)<br><a href="#">More Information</a>   <a href="#">Similar Motifs Found</a>         |
| 4    |       | 1e-30   | -7.014e+01   | 14.04%       | 5.35%           | 51.9bp (60.7bp) | RUNX(Runt)HPC7-Runt1-ChIP-Seq(GSE22178)/Homer(0.820)<br><a href="#">More Information</a>   <a href="#">Similar Motifs Found</a>               |
| 5    |       | 1e-24   | -5.645e+01   | 8.55%        | 2.69%           | 51.9bp (58.9bp) | EBF(EBF)/proBcell-EBF-ChIP-Seq(GSE21978)/Homer(0.941)<br><a href="#">More Information</a>   <a href="#">Similar Motifs Found</a>              |
| 6    |       | 1e-17   | -3.922e+01   | 17.57%       | 9.77%           | 53.4bp (62.8bp) | USF1/MA0093.2/Jaspar(0.939)<br><a href="#">More Information</a>   <a href="#">Similar Motifs Found</a>                                        |
| 7    |       | 1e-16   | -3.734e+01   | 13.96%       | 7.23%           | 57.4bp (61.7bp) | Fos1(bZIP)3T3L1-Fos1-ChIP-Seq(GSE56872)/Homer(0.928)<br><a href="#">More Information</a>   <a href="#">Similar Motifs Found</a>               |
| 8    |       | 1e-15   | -3.671e+01   | 3.53%        | 0.77%           | 55.4bp (61.6bp) | Oct11(POU/Homeobox)NCH1048-POU2F3-ChIP-seq(GSE115123)/Homer(0.965)<br><a href="#">More Information</a>   <a href="#">Similar Motifs Found</a> |
| 9    |       | 1e-15   | -3.649e+01   | 15.69%       | 8.58%           | 56.1bp (59.9bp) | RUNX-AML(Runt)CD4+-Poli-ChIP-Seq(Barski_et_al./Homer(0.823))<br><a href="#">More Information</a>   <a href="#">Similar Motifs Found</a>       |
| 10   |       | 1e-13   | -3.107e+01   | 3.69%        | 0.97%           | 55.7bp (61.1bp) | PB0167.1_Sox13_2/Jaspar(0.663)<br><a href="#">More Information</a>   <a href="#">Similar Motifs Found</a>                                     |
| 11   |       | 1e-12   | -2.935e+01   | 12.71%       | 6.95%           | 52.1bp (60.9bp) | POL009.1_DCE_S_II/Jaspar(0.675)<br><a href="#">More Information</a>   <a href="#">Similar Motifs Found</a>                                    |

RelA 4h

g

| Rank | Motif | P-value | log P-value | % of Targets | % of Background | STD(Bg STD)     | Best Match/Details                                                                                                               |
|------|-------|---------|-------------|--------------|-----------------|-----------------|----------------------------------------------------------------------------------------------------------------------------------|
| 1    |       | 1e-36   | -8.337e+01  | 20.47%       | 1.92%           | 45.7bp (65.6bp) | MF0003.1_REL_class/Jaspar(0.964)<br><a href="#">More Information</a>   <a href="#">Similar Motifs Found</a>                      |
| 2    |       | 1e-22   | -5.279e+01  | 14.17%       | 1.53%           | 55.6bp (65.6bp) | SpiB(ETS)/OCILY3-SPIB-ChIP-Seq(GSE56857)/Homer(0.929)<br><a href="#">More Information</a>   <a href="#">Similar Motifs Found</a> |
| 3    |       | 1e-13   | -3.162e+01  | 7.48%        | 0.66%           | 50.5bp (57.6bp) | EBF(EBF)/proBcell-EBF-ChIP-Seq(GSE21978)/Homer(0.837)<br><a href="#">More Information</a>   <a href="#">Similar Motifs Found</a> |

Rel 0h

| Rank | Motif | P-value | log P-value | % of Targets | % of Background | STD(Bg STD)     | Best Match/Details                                                                                                                       |
|------|-------|---------|-------------|--------------|-----------------|-----------------|------------------------------------------------------------------------------------------------------------------------------------------|
| 1    |       | 1e-166  | -3.842e+02  | 37.24%       | 6.82%           | 49.8bp (62.7bp) | NFkB-p65(RHD)/GM12787-p65-ChIP-Seq(GSE19485)/Homer(0.951)<br><a href="#">More Information</a>   <a href="#">Similar Motifs Found</a>     |
| 2    |       | 1e-79   | -1.829e+02  | 39.76%       | 14.95%          | 52.6bp (63.1bp) | PB0058.1_Sfp1.1/Jaspar(0.947)<br><a href="#">More Information</a>   <a href="#">Similar Motifs Found</a>                                 |
| 3    |       | 1e-30   | -7.118e+01  | 11.71%       | 3.27%           | 59.3bp (63.6bp) | RUNX(Runt)/HPC7-Runx1-ChIP-Seq(GSE22178)/Homer(0.963)<br><a href="#">More Information</a>   <a href="#">Similar Motifs Found</a>         |
| 4    |       | 1e-25   | -5.962e+01  | 17.76%       | 7.45%           | 56.2bp (62.5bp) | EBF2(EBF)/BrownAdipose-EBF2-ChIP-Seq(GSE97114)/Homer(0.906)<br><a href="#">More Information</a>   <a href="#">Similar Motifs Found</a>   |
| 5    |       | 1e-23   | -5.474e+01  | 7.27%        | 1.67%           | 53.7bp (60.8bp) | JUN(var.2)/MA0489.1/Jaspar(0.905)<br><a href="#">More Information</a>   <a href="#">Similar Motifs Found</a>                             |
| 6    |       | 1e-19   | -4.379e+01  | 5.05%        | 1.01%           | 51.5bp (61.6bp) | Oct2(POU,Homeobox)/Bcell-Oct2-ChIP-Seq(GSE21512)/Homer(0.955)<br><a href="#">More Information</a>   <a href="#">Similar Motifs Found</a> |
| 7    |       | 1e-18   | -4.164e+01  | 14.43%       | 6.50%           | 55.2bp (62.6bp) | CREB1/MA0018.3/Jaspar(0.947)<br><a href="#">More Information</a>   <a href="#">Similar Motifs Found</a>                                  |
| 8    |       | 1e-15   | -3.599e+01  | 1.11%        | 0.02%           | 38.1bp (42.7bp) | Bcl6/MA0463.1/Jaspar(0.730)<br><a href="#">More Information</a>   <a href="#">Similar Motifs Found</a>                                   |
| 9    |       | 1e-14   | -3.444e+01  | 4.34%        | 0.96%           | 47.1bp (72.3bp) | IRF2(IRF)/Erythroblasts-IRF2-ChIP-Seq(GSE36985)/Homer(0.809)<br><a href="#">More Information</a>   <a href="#">Similar Motifs Found</a>  |
| 10   |       | 1e-14   | -3.356e+01  | 6.05%        | 1.83%           | 56.7bp (58.0bp) | Creb3l2/MA0608.1/Jaspar(0.763)<br><a href="#">More Information</a>   <a href="#">Similar Motifs Found</a>                                |
| 11   |       | 1e-13   | -3.182e+01  | 3.73%        | 0.77%           | 49.8bp (61.3bp) | NFAT(RHD)/Jurkat-NFATC1-ChIP-Seq(Jolma_et_al.)/Homer(0.708)<br><a href="#">More Information</a>   <a href="#">Similar Motifs Found</a>   |
| 12   |       | 1e-13   | -3.071e+01  | 4.84%        | 1.32%           | 51.1bp (66.0bp) | Atrf1/MA0604.1/Jaspar(0.816)<br><a href="#">More Information</a>   <a href="#">Similar Motifs Found</a>                                  |
| 13   |       | 1e-13   | -3.069e+01  | 3.33%        | 0.64%           | 55.6bp (63.5bp) | MEF2D/MA0773.1/Jaspar(0.953)<br><a href="#">More Information</a>   <a href="#">Similar Motifs Found</a>                                  |
| 14   |       | 1e-12   | -2.975e+01  | 0.61%        | 0.00%           | 66.6bp (41.6bp) | SOX10/MA0442.2/Jaspar(0.623)<br><a href="#">More Information</a>   <a href="#">Similar Motifs Found</a>                                  |
| 15   |       | 1e-12   | -2.951e+01  | 8.07%        | 3.21%           | 53.2bp (65.9bp) | PB0108.1_Atrf1_2/Jaspar(0.687)<br><a href="#">More Information</a>   <a href="#">Similar Motifs Found</a>                                |

Rel 1h

| Rank | Motif | P-value | log P-value | % of Targets | % of Background | STD(Bg STD)     | Best Match/Details                                                                                                                              |
|------|-------|---------|-------------|--------------|-----------------|-----------------|-------------------------------------------------------------------------------------------------------------------------------------------------|
| 1    |       | 1e-276  | -6.362e+02  | 19.92%       | 4.36%           | 49.9bp (62.8bp) | NFkB-p65(RHD)/GM12787-p65-ChIP-Seq(GSE19485)/Homer(0.917)<br><a href="#">More Information</a>   <a href="#">Similar Motifs Found</a>            |
| 2    |       | 1e-254  | -5.851e+02  | 31.04%       | 10.93%          | 53.4bp (62.7bp) | PB0058.1_Sfp1.1/Jaspar(0.932)<br><a href="#">More Information</a>   <a href="#">Similar Motifs Found</a>                                        |
| 3    |       | 1e-115  | -2.657e+02  | 20.79%       | 8.84%           | 54.3bp (63.4bp) | RUNX1(Runt)/Jurkat-RUNX1-ChIP-Seq(GSE29180)/Homer(0.844)<br><a href="#">More Information</a>   <a href="#">Similar Motifs Found</a>             |
| 4    |       | 1e-62   | -1.444e+02  | 4.75%        | 1.04%           | 51.6bp (59.6bp) | Oct11(POU,Homeobox)/NCIH1048-POU2F3-ChIP-seq(GSE115123)/Homer(0.979)<br><a href="#">More Information</a>   <a href="#">Similar Motifs Found</a> |
| 5    |       | 1e-52   | -1.214e+02  | 14.04%       | 7.01%           | 55.4bp (62.8bp) | AP-1(bZIP)/ThioMac-PU.1-ChIP-Seq(GSE21512)/Homer(0.979)<br><a href="#">More Information</a>   <a href="#">Similar Motifs Found</a>              |
| 6    |       | 1e-50   | -1.163e+02  | 13.96%       | 7.07%           | 55.2bp (62.3bp) | Atrf1(bZIP)/K562-ATF1-ChIP-Seq(GSE31477)/Homer(0.913)<br><a href="#">More Information</a>   <a href="#">Similar Motifs Found</a>                |
| 7    |       | 1e-40   | -9.221e+01  | 24.26%       | 16.01%          | 55.7bp (63.2bp) | Egr2(Zf)/Thymocytes-Egr2-ChIP-Seq(GSE34254)/Homer(0.838)<br><a href="#">More Information</a>   <a href="#">Similar Motifs Found</a>             |
| 8    |       | 1e-38   | -8.854e+01  | 6.12%        | 2.35%           | 52.6bp (58.2bp) | EBF(EBF)/proBcell-EBF-ChIP-Seq(GSE21978)/Homer(0.946)<br><a href="#">More Information</a>   <a href="#">Similar Motifs Found</a>                |
| 9    |       | 1e-30   | -6.946e+01  | 4.21%        | 1.50%           | 52.1bp (63.2bp) | MEF2A/MA0052.3/Jaspar(0.915)<br><a href="#">More Information</a>   <a href="#">Similar Motifs Found</a>                                         |
| 10   |       | 1e-27   | -6.298e+01  | 12.77%       | 7.72%           | 53.6bp (65.5bp) | SPI/MA0079.3/Jaspar(0.882)<br><a href="#">More Information</a>   <a href="#">Similar Motifs Found</a>                                           |
| 11   |       | 1e-25   | -5.911e+01  | 0.36%        | 0.00%           | 54.9bp (32.1bp) | NFAT(RHD)/Jurkat-NFATC1-ChIP-Seq(Jolma_et_al.)/Homer(0.767)<br><a href="#">More Information</a>   <a href="#">Similar Motifs Found</a>          |
| 12   |       | 1e-25   | -5.898e+01  | 9.31%        | 5.18%           | 55.1bp (64.5bp) | Nur77(NR)/K562-NR4A1-ChIP-Seq(GSE31363)/Homer(0.834)<br><a href="#">More Information</a>   <a href="#">Similar Motifs Found</a>                 |
| 13   |       | 1e-24   | -5.682e+01  | 10.05%       | 5.81%           | 57.4bp (65.4bp) | PAX5/MA0014.3/Jaspar(0.674)<br><a href="#">More Information</a>   <a href="#">Similar Motifs Found</a>                                          |
| 14   |       | 1e-20   | -4.703e+01  | 3.40%        | 1.34%           | 52.5bp (72.2bp) | MF0003.1_REL_class/Jaspar(0.668)<br><a href="#">More Information</a>   <a href="#">Similar Motifs Found</a>                                     |
| 15   |       | 1e-20   | -4.616e+01  | 3.27%        | 1.28%           | 58.0bp (67.4bp) | FOXJ1/MA0042.2/Jaspar(0.704)<br><a href="#">More Information</a>   <a href="#">Similar Motifs Found</a>                                         |
| 16   |       | 1e-17   | -3.960e+01  | 0.56%        | 0.04%           | 62.0bp (49.7bp) | ZNF528(Zf)/HEK293-ZNF528-GFP-ChIP-Seq(GSE38341)/Homer(0.678)<br><a href="#">More Information</a>   <a href="#">Similar Motifs Found</a>         |
| 17   |       | 1e-14   | -3.435e+01  | 1.83%        | 0.61%           | 56.2bp (58.5bp) | Gmeb1/MA0615.1/Jaspar(0.686)<br><a href="#">More Information</a>   <a href="#">Similar Motifs Found</a>                                         |
| 18   |       | 1e-12   | -2.935e+01  | 1.75%        | 0.63%           | 50.2bp (60.1bp) | SPDEF/MA0686.1/Jaspar(0.880)<br><a href="#">More Information</a>   <a href="#">Similar Motifs Found</a>                                         |
| 19   |       | 1e-12   | -2.852e+01  | 0.25%        | 0.01%           | 54.7bp (71.9bp) | PB0206.1_Zic2_2/Jaspar(0.730)<br><a href="#">More Information</a>   <a href="#">Similar Motifs Found</a>                                        |

Rel 18h

h

## TFmotifView

<http://bardet.u-strasbg.fr/tfmotifview/>

## RelA 1h

| Motif ID          | Number of target regions |       | Number of local control regions |       | Number of global control regions |       | Percent of regions with motifs |                |                 | Enrichment over local controls |           | Enrichment over global controls |           |
|-------------------|--------------------------|-------|---------------------------------|-------|----------------------------------|-------|--------------------------------|----------------|-----------------|--------------------------------|-----------|---------------------------------|-----------|
|                   | With motifs              | Total | With motifs                     | Total | With motifs                      | Total | Target regions                 | Local controls | Global controls | Fold change                    | P-value   | Fold change                     | P-value   |
| ERG.MA0474.2      | 2170                     | 3821  | 1388                            | 3821  | 1333                             | 3821  | 56.79%                         | 36.33%         | 34.89%          | 1.5634                         | 1.524e-72 | 1.6279                          | 4.485e-83 |
| REL.MA0101.1      | 2918                     | 3821  | 2417                            | 3821  | 2360                             | 3821  | 76.37%                         | 63.26%         | 61.76%          | 1.2073                         | 3.918e-36 | 1.2364                          | 8.004e-44 |
| NFKB2.MA0778.1    | 421                      | 3821  | 122                             | 3821  | 122                              | 3821  | 11.02%                         | 3.19%          | 3.19%           | 3.4508                         | 1.605e-42 | 3.4508                          | 1.605e-42 |
| ZBTB14.MA1650.1   | 1879                     | 3821  | 1544                            | 3821  | 1310                             | 3821  | 49.18%                         | 40.41%         | 34.28%          | 1.217                          | 7.456e-15 | 1.4344                          | 4.142e-40 |
| GABPA.MA0062.3    | 2981                     | 3821  | 2571                            | 3821  | 2503                             | 3821  | 78.02%                         | 67.29%         | 65.51%          | 1.1595                         | 3.425e-26 | 1.191                           | 2.562e-34 |
| AHR_ARNT.MA0006.1 | 2230                     | 3821  | 1909                            | 3821  | 1707                             | 3821  | 58.36%                         | 49.96%         | 44.67%          | 1.1682                         | 9.839e-14 | 1.3064                          | 2.654e-33 |
| NRF1.MA0506.1     | 1011                     | 3821  | 664                             | 3821  | 621                              | 3821  | 26.46%                         | 17.38%         | 16.25%          | 1.5226                         | 4.209e-22 | 1.628                           | 5.769e-28 |
| HES1.MA1099.2     | 1879                     | 3821  | 1619                            | 3821  | 1411                             | 3821  | 49.18%                         | 42.37%         | 36.93%          | 1.1606                         | 1.348e-9  | 1.3317                          | 1.654e-27 |
| ZFP57.MA1583.1    | 1421                     | 3821  | 1049                            | 3821  | 983                              | 3821  | 37.19%                         | 27.45%         | 25.73%          | 1.3546                         | 5.101e-20 | 1.4456                          | 1.964e-27 |
| HINFP.MA0131.2    | 1009                     | 3821  | 650                             | 3821  | 645                              | 3821  | 26.41%                         | 17.01%         | 16.88%          | 1.5523                         | 1.089e-23 | 1.5643                          | 2.348e-24 |

## Rel 18h

| Motif ID          | Number of target regions |       | Number of local control regions |       | Number of global control regions |       | Percent of regions with motifs |                |                 | Enrichment over local controls |           | Enrichment over global controls |            |
|-------------------|--------------------------|-------|---------------------------------|-------|----------------------------------|-------|--------------------------------|----------------|-----------------|--------------------------------|-----------|---------------------------------|------------|
|                   | With motifs              | Total | With motifs                     | Total | With motifs                      | Total | Target regions                 | Local controls | Global controls | Fold change                    | P-value   | Fold change                     | P-value    |
| ERG.MA0474.2      | 1620                     | 3940  | 962                             | 3940  | 752                              | 3940  | 41.12%                         | 24.42%         | 19.09%          | 1.684                          | 9.117e-57 | 2.1543                          | 1.199e-102 |
| REL.MA0101.1      | 2449                     | 3940  | 1762                            | 3940  | 1651                             | 3940  | 62.16%                         | 44.72%         | 41.90%          | 1.3899                         | 1.04e-54  | 1.4833                          | 5.269e-73  |
| NFKB2.MA0778.1    | 356                      | 3940  | 74                              | 3940  | 67                               | 3940  | 9.04%                          | 1.88%          | 1.70%           | 4.8108                         | 6.343e-48 | 5.3134                          | 2.137e-51  |
| GABPA.MA0062.3    | 2414                     | 3940  | 1967                            | 3940  | 1780                             | 3940  | 61.27%                         | 49.92%         | 45.18%          | 1.2272                         | 2.173e-24 | 1.3562                          | 7.866e-47  |
| RELB.MA1117.1     | 2844                     | 3940  | 2379                            | 3940  | 2251                             | 3940  | 72.18%                         | 60.38%         | 57.13%          | 1.1955                         | 8.037e-29 | 1.2634                          | 8.878e-45  |
| EGR1.MA0162.4     | 2511                     | 3940  | 2272                            | 3940  | 1969                             | 3940  | 63.73%                         | 57.66%         | 49.97%          | 1.1052                         | 1.994e-8  | 1.2753                          | 3.271e-35  |
| ZBTB14.MA1650.1   | 1617                     | 3940  | 1364                            | 3940  | 1124                             | 3940  | 41.04%                         | 34.62%         | 28.53%          | 1.1855                         | 2.367e-9  | 1.4386                          | 1.016e-31  |
| WT1.MA1627.1      | 2109                     | 3940  | 1842                            | 3940  | 1599                             | 3940  | 53.53%                         | 46.75%         | 40.58%          | 1.145                          | 1.016e-9  | 1.3189                          | 6.291e-31  |
| AHR_ARNT.MA0006.1 | 1733                     | 3940  | 1449                            | 3940  | 1266                             | 3940  | 43.98%                         | 36.78%         | 32.13%          | 1.196                          | 3.997e-11 | 1.3689                          | 1.26e-27   |
| KLF5.MA0599.1     | 2458                     | 3940  | 2106                            | 3940  | 1991                             | 3940  | 62.39%                         | 53.45%         | 50.53%          | 1.1671                         | 5.501e-16 | 1.2346                          | 1.471e-26  |

RelA 1h:

<http://bardet.u-strasbg.fr/tfmotifview/?results=734fKxPAnCh8w1>

Rel 18h:

<http://bardet.u-strasbg.fr/tfmotifview/?results=H1bHoldGkHrKPpy>

i

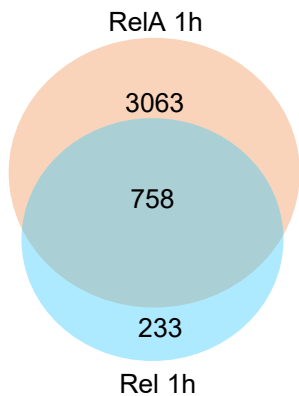

j

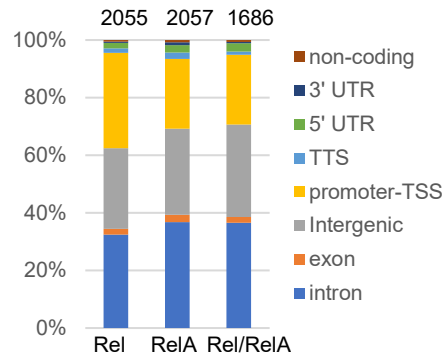

k

| Rank | Motif | P-value | log P-pvalue | % of Targets | % of Background | STD(Bg STD)     | Best Match Details                                                                                                                            |
|------|-------|---------|--------------|--------------|-----------------|-----------------|-----------------------------------------------------------------------------------------------------------------------------------------------|
| 1    |       | 1e-118  | -2.736e+02   | 29.02%       | 10.45%          | 55.1bp (62.9bp) | PB0058.1_Sfp1_1/Jaspar(0.963)<br><a href="#">More Information</a>   <a href="#">Similar Motifs Found</a>                                      |
| 2    |       | 1e-87   | -2.021e+02   | 12.56%       | 2.78%           | 49.1bp (62.5bp) | NFKB-p65(RHD) GM12787-p65-ChIP-Seq(GSE19485)/Homer(0.960)<br><a href="#">More Information</a>   <a href="#">Similar Motifs Found</a>          |
| 3    |       | 1e-44   | -1.036e+02   | 30.57%       | 17.72%          | 55.0bp (66.0bp) | IRF4(IRF) GM12878-IRF4-ChIP-Seq(GSE32465)/Homer(0.901)<br><a href="#">More Information</a>   <a href="#">Similar Motifs Found</a>             |
| 4    |       | 1e-33   | -7.813e+01   | 4.48%        | 0.90%           | 51.0bp (60.7bp) | Oct1(POU Homeobox) NCH1048-POU2F3-ChIP-seq(GSE115123)/Homer(0.961)<br><a href="#">More Information</a>   <a href="#">Similar Motifs Found</a> |
| 5    |       | 1e-31   | -7.341e+01   | 40.94%       | 28.70%          | 54.0bp (63.2bp) | Sp5(ZF)mES-Sp5-Flag-ChIP-Seq(GSE72989)/Homer(0.836)<br><a href="#">More Information</a>   <a href="#">Similar Motifs Found</a>                |
| 6    |       | 1e-26   | -6.153e+01   | 12.90%       | 6.33%           | 54.3bp (61.5bp) | Fra1(bZIP) BT549-Fra1-ChIP-Seq(GSE46166)/Homer(0.935)<br><a href="#">More Information</a>   <a href="#">Similar Motifs Found</a>              |
| 7    |       | 1e-22   | -5.222e+01   | 9.01%        | 4.03%           | 52.8bp (65.9bp) | Arnt1(MA0603.1)/Jaspar(0.973)<br><a href="#">More Information</a>   <a href="#">Similar Motifs Found</a>                                      |
| 8    |       | 1e-20   | -4.665e+01   | 4.92%        | 1.66%           | 55.9bp (63.0bp) | NR4A1(MA1112.1)/Jaspar(0.836)<br><a href="#">More Information</a>   <a href="#">Similar Motifs Found</a>                                      |
| 9    |       | 1e-20   | -4.618e+01   | 2.43%        | 0.46%           | 54.3bp (58.9bp) | RUNX1(Runt) Jurkat RUNX1-ChIP-Seq(GSE29180)/Homer(0.876)<br><a href="#">More Information</a>   <a href="#">Similar Motifs Found</a>           |
| 10   |       | 1e-18   | -4.213e+01   | 27.75%       | 19.64%          | 52.6bp (65.9bp) | SP3(MA0746.1)/Jaspar(0.929)<br><a href="#">More Information</a>   <a href="#">Similar Motifs Found</a>                                        |
| 11   |       | 1e-15   | -3.554e+01   | 0.39%        | 0.00%           | 54.7bp (0.0bp)  | Zfp57(Zf) H1-ZFP57-HA-ChIP-Seq(GSE115387)/Homer(0.647)<br><a href="#">More Information</a>   <a href="#">Similar Motifs Found</a>             |
| 12   |       | 1e-15   | -3.541e+01   | 6.04%        | 2.69%           | 59.0bp (64.0bp) | PU.1-IRF(ETS-IRF) Bcell-PU.1-ChIP-Seq(GSE21512)/Homer(0.816)<br><a href="#">More Information</a>   <a href="#">Similar Motifs Found</a>       |
| 13   |       | 1e-12   | -2.933e+01   | 5.06%        | 2.28%           | 56.6bp (60.9bp) | NRF(NRF) Promoter/Homer(0.972)<br><a href="#">More Information</a>   <a href="#">Similar Motifs Found</a>                                     |

  

| Rank | Motif | P-value | log P-pvalue | % of Targets | % of Background | STD(Bg STD)     | Best Match Details                                                                                                                    |
|------|-------|---------|--------------|--------------|-----------------|-----------------|---------------------------------------------------------------------------------------------------------------------------------------|
| 1    |       | 1e-58   | -1.341e+02   | 14.39%       | 4.97%           | 52.9bp (59.9bp) | PB0058.1_Sfp1_1/Jaspar(0.952)<br><a href="#">More Information</a>   <a href="#">Similar Motifs Found</a>                              |
| 2    |       | 1e-35   | -8.181e+01   | 24.65%       | 14.18%          | 54.2bp (62.7bp) | NFKB-p65(RHD) GM12787-p65-ChIP-Seq(GSE19485)/Homer(0.924)<br><a href="#">More Information</a>   <a href="#">Similar Motifs Found</a>  |
| 3    |       | 1e-22   | -5.276e+01   | 39.67%       | 29.37%          | 56.6bp (64.9bp) | TFCP2(MA0145.3)/Jaspar(0.747)<br><a href="#">More Information</a>   <a href="#">Similar Motifs Found</a>                              |
| 4    |       | 1e-21   | -5.018e+01   | 2.82%        | 0.57%           | 56.9bp (58.2bp) | Oct4(POU Homeobox)mES-Oct4-ChIP-Seq(GSE11431)/Homer(0.967)<br><a href="#">More Information</a>   <a href="#">Similar Motifs Found</a> |
| 5    |       | 1e-19   | -4.415e+01   | 13.22%       | 7.44%           | 54.0bp (62.4bp) | Arnt1(MA0603.1)/Jaspar(0.966)<br><a href="#">More Information</a>   <a href="#">Similar Motifs Found</a>                              |
| 6    |       | 1e-17   | -4.070e+01   | 5.54%        | 2.20%           | 52.5bp (57.8bp) | EBF(EBF) proBcell-EBF-ChIP-Seq(GSE21978)/Homer(0.982)<br><a href="#">More Information</a>   <a href="#">Similar Motifs Found</a>      |
| 7    |       | 1e-15   | -3.598e+01   | 6.81%        | 3.19%           | 55.5bp (60.0bp) | AP-1(bZIP) ThioMac-PU.1-ChIP-Seq(GSE21512)/Homer(0.978)<br><a href="#">More Information</a>   <a href="#">Similar Motifs Found</a>    |
| 8    |       | 1e-15   | -3.534e+01   | 8.85%        | 4.66%           | 55.2bp (68.8bp) | IRF8(IRF) BMDM-IRF8-ChIP-Seq(GSE77884)/Homer(0.865)<br><a href="#">More Information</a>   <a href="#">Similar Motifs Found</a>        |
| 9    |       | 1e-13   | -3.097e+01   | 0.44%        | 0.01%           | 45.4bp (23.9bp) | SCRT2(MA0744.1)/Jaspar(0.786)<br><a href="#">More Information</a>   <a href="#">Similar Motifs Found</a>                              |
| 10   |       | 1e-13   | -3.028e+01   | 14.29%       | 9.22%           | 57.3bp (61.9bp) | E2F3(E2F) MEF-E2F3-ChIP-Seq(GSE71376)/Homer(0.658)<br><a href="#">More Information</a>   <a href="#">Similar Motifs Found</a>         |
| 11   |       | 1e-12   | -2.976e+01   | 2.77%        | 0.87%           | 56.7bp (60.7bp) | PB0162.1_Sfp1_2/Jaspar(0.702)<br><a href="#">More Information</a>   <a href="#">Similar Motifs Found</a>                              |
| 12   |       | 1e-12   | -2.954e+01   | 1.51%        | 0.28%           | 49.8bp (61.5bp) | YY1(MA0095.2)/Jaspar(0.876)<br><a href="#">More Information</a>   <a href="#">Similar Motifs Found</a>                                |
| 13   |       | 1e-12   | -2.865e+01   | 1.17%        | 0.17%           | 43.8bp (63.8bp) | PB0033.1_Irf3_1/Jaspar(0.724)<br><a href="#">More Information</a>   <a href="#">Similar Motifs Found</a>                              |
| 14   |       | 1e-12   | -2.848e+01   | 3.40%        | 1.26%           | 51.8bp (57.9bp) | ASCL1(MA1100.1)/Jaspar(0.651)<br><a href="#">More Information</a>   <a href="#">Similar Motifs Found</a>                              |

  

| Rank | Motif | P-value | log P-pvalue | % of Targets | % of Background | STD(Bg STD)     | Best Match Details                                                                                                                        |
|------|-------|---------|--------------|--------------|-----------------|-----------------|-------------------------------------------------------------------------------------------------------------------------------------------|
| 1    |       | 1e-134  | -3.099e+02   | 25.76%       | 6.55%           | 53.0bp (61.8bp) | NFKB-p65(RHD) GM12787-p65-ChIP-Seq(GSE19485)/Homer(0.946)<br><a href="#">More Information</a>   <a href="#">Similar Motifs Found</a>      |
| 2    |       | 1e-108  | -2.509e+02   | 29.55%       | 10.04%          | 52.1bp (61.4bp) | PB0058.1_Sfp1_1/Jaspar(0.934)<br><a href="#">More Information</a>   <a href="#">Similar Motifs Found</a>                                  |
| 3    |       | 1e-64   | -1.495e+02   | 8.55%        | 1.38%           | 54.1bp (69.4bp) | PU.1-IRF8(ETS-IRF) pDC-IrF8-ChIP-Seq(GSE66899)/Homer(0.939)<br><a href="#">More Information</a>   <a href="#">Similar Motifs Found</a>    |
| 4    |       | 1e-47   | -1.096e+02   | 19.29%       | 8.07%           | 53.2bp (64.3bp) | IRF4(IRF) GM12878-IRF4-ChIP-Seq(GSE32465)/Homer(0.795)<br><a href="#">More Information</a>   <a href="#">Similar Motifs Found</a>         |
| 5    |       | 1e-24   | -5.552e+01   | 2.14%        | 0.20%           | 53.8bp (55.6bp) | Oct2(POU Homeobox) Bcell-Oct2-ChIP-Seq(GSE21512)/Homer(0.945)<br><a href="#">More Information</a>   <a href="#">Similar Motifs Found</a>  |
| 6    |       | 1e-23   | -5.450e+01   | 11.93%       | 5.48%           | 54.3bp (59.7bp) | EBF2(EBF) BrownAdipose-EBF2-ChIP-Seq(GSE97114)/Homer(0.919)<br><a href="#">More Information</a>   <a href="#">Similar Motifs Found</a>    |
| 7    |       | 1e-22   | -5.152e+01   | 7.12%        | 2.53%           | 57.6bp (60.3bp) | JunB(bZIP) DendriticCells-JunB-ChIP-Seq(GSE36099)/Homer(0.972)<br><a href="#">More Information</a>   <a href="#">Similar Motifs Found</a> |
| 8    |       | 1e-19   | -4.575e+01   | 6.05%        | 2.09%           | 53.9bp (60.1bp) | RUNX(Runt) HPC7-Runx1-ChIP-Seq(GSE22178)/Homer(0.939)<br><a href="#">More Information</a>   <a href="#">Similar Motifs Found</a>          |
| 9    |       | 1e-19   | -4.514e+01   | 36.68%       | 26.46%          | 55.5bp (61.7bp) | USF1(MA0093.2)/Jaspar(0.855)<br><a href="#">More Information</a>   <a href="#">Similar Motifs Found</a>                                   |
| 10   |       | 1e-18   | -4.161e+01   | 5.52%        | 1.92%           | 56.1bp (60.7bp) | MEF2A(MA0052.3)/Jaspar(0.835)<br><a href="#">More Information</a>   <a href="#">Similar Motifs Found</a>                                  |
| 11   |       | 1e-12   | -2.888e+01   | 1.84%        | 0.35%           | 46.8bp (64.1bp) | Klf12(MA0742.1)/Jaspar(0.742)<br><a href="#">More Information</a>   <a href="#">Similar Motifs Found</a>                                  |

l

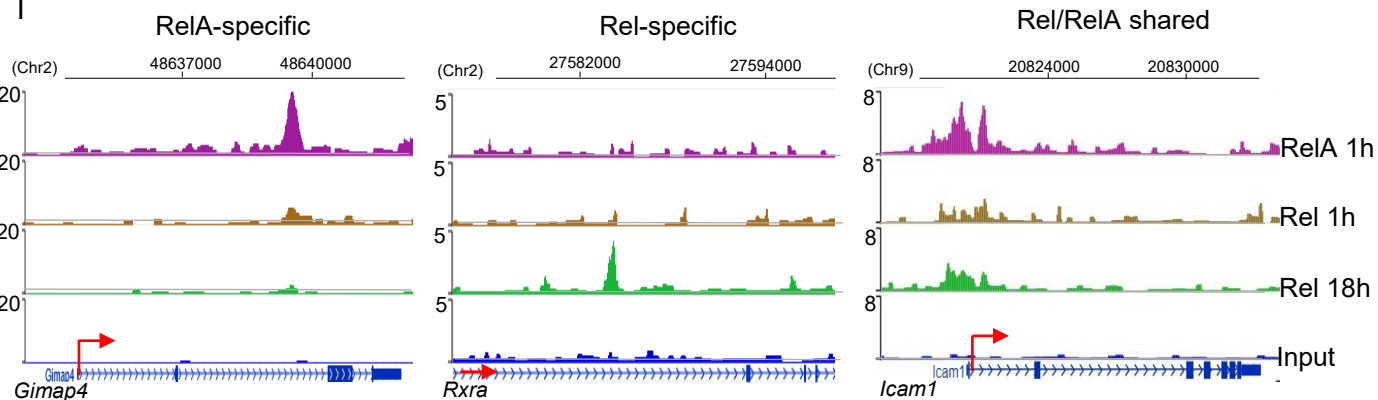

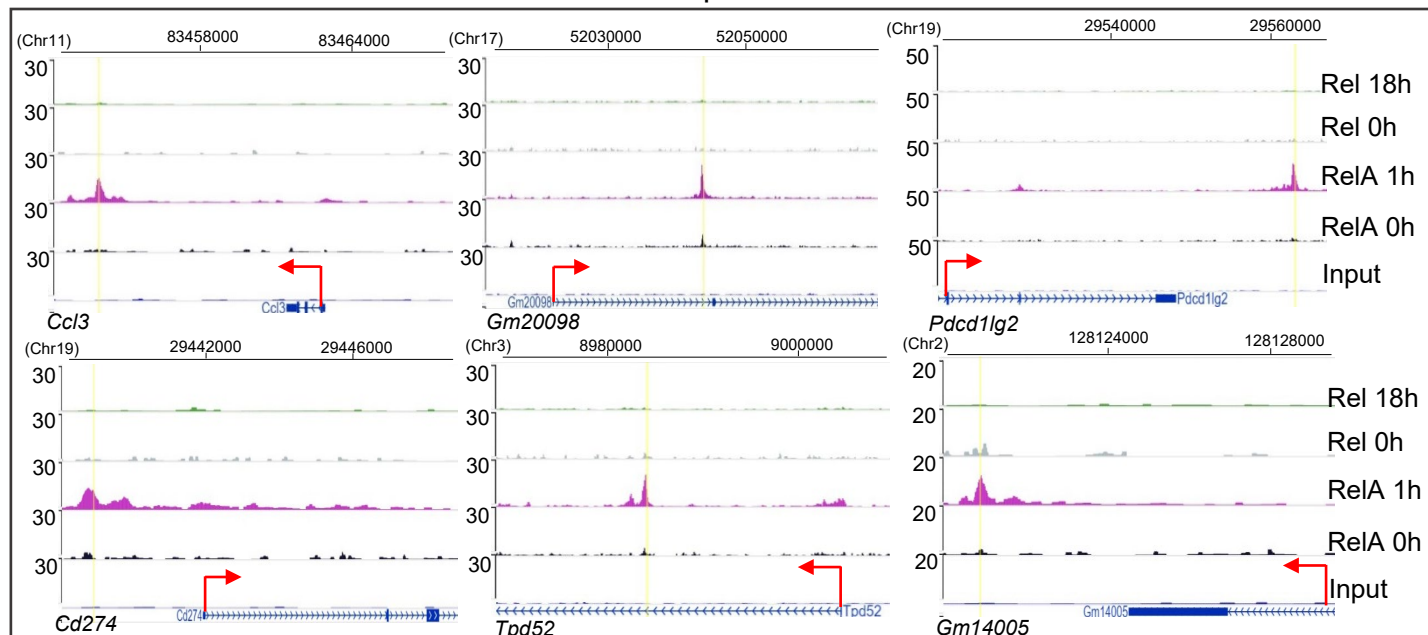

Rel specific

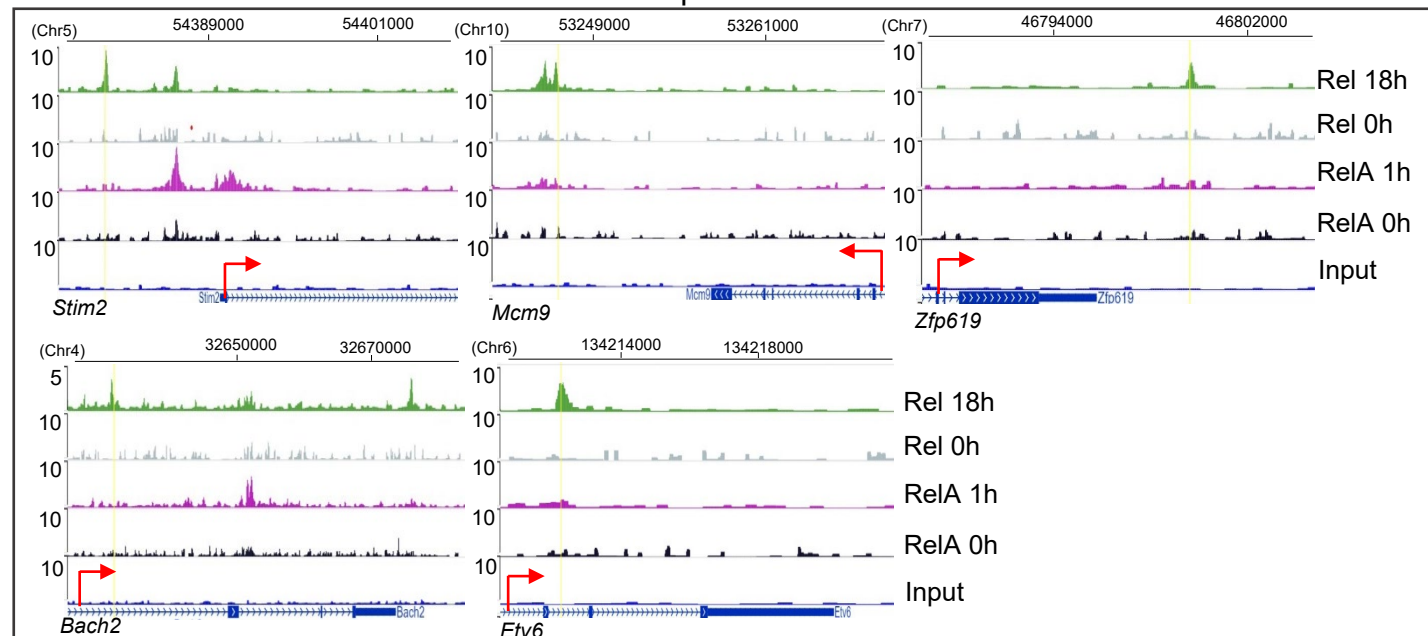

RelA/Rel shared

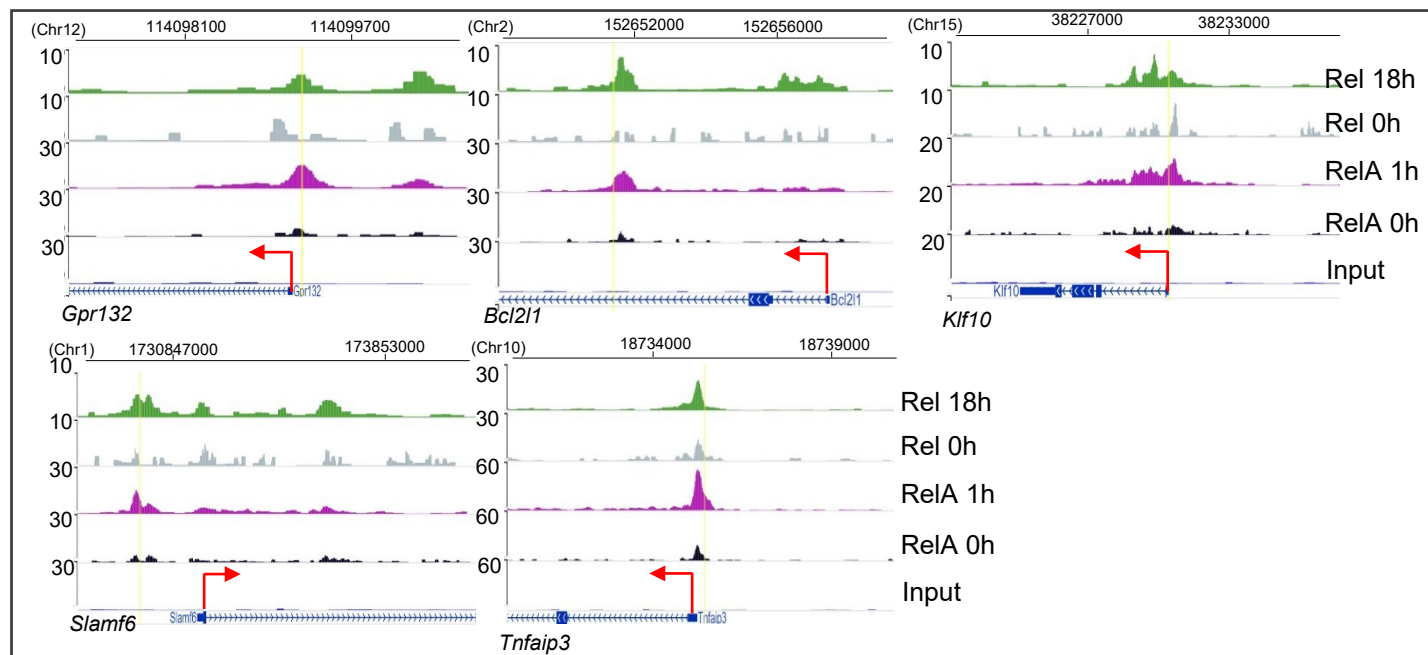

## Figure S1: RelA and Rel ChIP-Seq in BCR activated spleen B cells

**a, b** RelA nuclear translocation after activation. Splenic B cells were activated with anti-IgM Fab<sup>2</sup> (10 $\mu$ g/ml) or PMA (50nM) + ionomycin (0.5 $\mu$ g/ml) for 1h and stained for RelA (RelA-APC) and nucleus (DAPI). RelA nuclear translocation was measured using Amnis Imagestream Mk II and quantified using IDEAS software **a**, Representative images of Imagestream at indicated times and activation regimes. Similarity index scores (yellow fonts) overlap between DAPI and RelA-APC channels **b**, Histogram representing RelA nuclear translocation (similarity index) of >6000 cells at (top) and bar graph representing mean of RelA translocation from 3 independent experiments (bottom). Error bars represent SEM. Translocation gate in the histogram indicates cells with nuclear RelA. **c**, Specificity check of anti-Rel and anti-RelA antibodies. RelA or Rel recruitment to promoter regions of target genes, WT and *Rel* KO splenic B cells activated as indicated. Fold change was calculated by comparison with an equal amount of input DNA (200pg) and a non-NF- $\kappa$ B binding genomic region. Error bar represents the SEM. *t*-test significance \*\* =  $p \leq 0.005$ . **d**, Bowtie analysis summary table of each replicate RelA and Rel ChIP-Seq library **e**, Scatterplots, created with deepTools bamCorrelate, depicting Pearson correlation between biological replicate RelA and Rel ChIP-Seq libraries **f, g** Complete list of significant transcription factor binding motifs (default statistical setting provided by HOMER) to enriched within RelA peaks (**f**), Rel peaks (**g**) at different time points identified using HOMER (*de novo*). **h**, Transcription factors (TF) motifs under RelA 1h and Rel 18h peaks were identified by TFmotifView. The top 10 enriched over global control TF binding motifs are shown (statistical test provided according to TFmotifView). The entire TF binding motif analysis' can be found using the links provided. **i**, Venn diagram depicting the overlap between RelA and Rel binding sites genome-wide after 1h BCR crosslinking. Peaks were chosen with a threshold of 10-fold (RelA) and 5- fold (Rel) change compared to input. **j**, Genomic annotation of unique and shared Rel- and RelA-specific binding region (Figure 1b) using HOMER. **k**, List of significant transcription factor binding motifs (default statistical setting from HOMER) enriched within RelA-specific, Rel-specific and RelA/Rel shared peaks identified using HOMER (*de novo*). **l**, Representative genome browser tracks (mm9) of RelA-specific, Rel-specific and Rel/RelA shared binding of RelA at indicated times compared to input. The y axis represents normalized reads per 10 million.



a

| Sample_name  | Total reads | Overall alignment rate |
|--------------|-------------|------------------------|
| H3K4me3 0h1  | 25211666    | 96.59%                 |
| H3K4me3 0h2  | 23659972    | 96.49%                 |
| H3K4me3 1h1  | 21764483    | 94.29%                 |
| H3K4me3 1h2  | 21925488    | 92.27%                 |
| H3K4me3 18h1 | 17167855    | 92.54%                 |
| H3K4me3 18h2 | 29715723    | 93.92%                 |
| H3K27ac 0h1  | 37095861    | 97.65%                 |
| H3K27ac 0h2  | 36375511    | 97.50%                 |
| H3K4me1 0h1  | 36185201    | 96.83%                 |
| H3K4me1 0h2  | 43800808    | 97.00%                 |
| ATAC 0h1     | 88994694    | 89.65%                 |
| ATAC 0h2     | 154175378   | 90.88%                 |
| ATAC 1h1     | 177728362   | 91.82%                 |
| ATAC 1h2     | 93133477    | 87.99%                 |
| ATAC 4h1     | 161913062   | 91.28%                 |
| ATAC 4h2     | 138408887   | 90.84%                 |
| ATAC 18h1    | 179624575   | 77.58%                 |
| ATAC 18h2    | 158563820   | 72.92%                 |

b

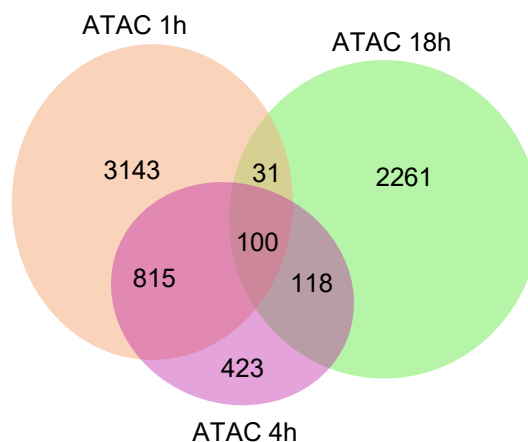

c

1h inducible ATAC peaks (*de novo*)18h inducible ATAC peaks (*de novo*)

| Consensus sequence | P-value | Motif Name | Consensus sequence | P-value | Motif Name |
|--------------------|---------|------------|--------------------|---------|------------|
|                    | 1e-190  | Sfp1       |                    | 1e-83   | BORIS(Zf)  |
|                    | 1e-167  | Fra1(bZIP) |                    | 1e-25   | NRF1(NRF)  |
|                    | 1e-103  | TFE3(bHLH) |                    | 1e-23   | Sp2(Zf)    |
|                    | 1e-102  | NFkB-p65   |                    | 1e-23   | POL004.1   |

d

1h unchanged ATAC peaks (*de novo*)18h unchanged ATAC peaks (*de novo*)

| Consensus sequence | P-value | Motif Name | Consensus sequence | P-value | Motif Name |
|--------------------|---------|------------|--------------------|---------|------------|
|                    | 1e-960  | BORIS(Zf)  |                    | 1e-491  | BORIS(Zf)  |
|                    | 1e-360  | SPIC       |                    | 1e-117  | Elf4(ETS)  |
|                    | 1e-178  | PU.1:IRF8  |                    | 1e-104  | Sp1(Zf)    |
|                    | 1e-77   | CTCFL      |                    | 1e-77   | ZNF652     |

## Figure S2: Kinetics of chromatin accessibility and histone modifications in activated B cells.

**a**, Bowtie analysis. Table reporting Sample name, Total reads, and Overall alignment rate of each biological replicate ChIP-Seq and ATAC-Seq library. **b**, Venn diagram of the overlap of induced ATAC-seq peaks at 1h, 4h and 18h. Induced peaks were identified, using Diffbind settings of  $FDR \leq 0.05$  and fold change  $\geq 1.5$  compared with ATAC-seq at 0h. **c**, Motif analysis of sequences underlying induced ATAC-seq peaks compared to 0h was carried out using HOMER. The top 4 *de novo* motifs associated with differential ATAC-Seq peaks at 1h and 18h are shown. **d**, Motif analysis of sequences underlying ATAC-Seq peaks whose intensity did not change with BCR crosslinking was carried out using HOMER. The top 4 *de novo* motifs at 1h and 18h are shown.

a

| Sample_name                | Total reads | Overall alignment rate |
|----------------------------|-------------|------------------------|
| RelA <sup>fl/fl</sup> 0h1  | 52709768    | 76.57%                 |
| RelA <sup>fl/fl</sup> 0h2  | 51660032    | 77.57%                 |
| RelA <sup>fl/fl</sup> 1h1  | 54038778    | 75.48%                 |
| RelA <sup>fl/fl</sup> 1h2  | 59370298    | 76.57%                 |
| RelA <sup>fl/fl</sup> 4h1  | 51755497    | 78.98%                 |
| RelA <sup>fl/fl</sup> 4h2  | 61225427    | 79.61%                 |
| RelA <sup>fl/fl</sup> 18h1 | 53191016    | 81.99%                 |
| RelA <sup>fl/fl</sup> 18h2 | 53202127    | 79.98%                 |
| RelA cKO 0h1               | 60172856    | 75.06%                 |
| RelA cKO 0h2               | 51524671    | 77.12%                 |
| RelA cKO 1h1               | 48708742    | 73.76%                 |
| RelA cKO 1h2               | 55075342    | 75.79%                 |
| RelA cKO 4h1               | 65529355    | 75.71%                 |
| RelA cKO 4h2               | 55624647    | 72.32%                 |
| RelA cKO 18h1              | 56854065    | 79.80%                 |
| RelA cKO 18h2              | 53563852    | 78.40%                 |
| WT 0h1                     | 45489853    | 52.81%                 |
| WT 0h2                     | 47990047    | 57.03%                 |
| WT 1h1                     | 46439931    | 60.71%                 |
| WT 1h2                     | 46858768    | 58.31%                 |
| WT 4h1                     | 51951065    | 58.98%                 |
| WT 4h2                     | 45914819    | 60.60%                 |
| WT 18h1                    | 41878859    | 70.86%                 |
| WT 18h2                    | 45061051    | 67.28%                 |
| BAY 0h1                    | 45553160    | 51.94%                 |
| BAY 0h2                    | 43840510    | 62.54%                 |
| BAY 1h1                    | 42685079    | 62.50%                 |
| BAY 1h2                    | 50860425    | 49.46%                 |
| BAY 4h1                    | 45405779    | 65.48%                 |
| BAY 4h2                    | 49110887    | 64.38%                 |
| BAY 18h1                   | 49241869    | 56.47%                 |
| BAY 18h2                   | 44424315    | 68.84%                 |
| Rel KO 0h1                 | 54293019    | 48.50%                 |
| Rel KO 0h2                 | 48109867    | 55.99%                 |
| Rel KO 1h1                 | 51083828    | 45.51%                 |
| Rel KO 1h2                 | 51274238    | 43.46%                 |
| Rel KO 4h1                 | 50733414    | 56.40%                 |
| Rel KO 4h2                 | 48787522    | 52.29%                 |
| Rel KO 18h1                | 43733327    | 59.29%                 |
| Rel KO 18h2                | 44460601    | 64.81%                 |

b

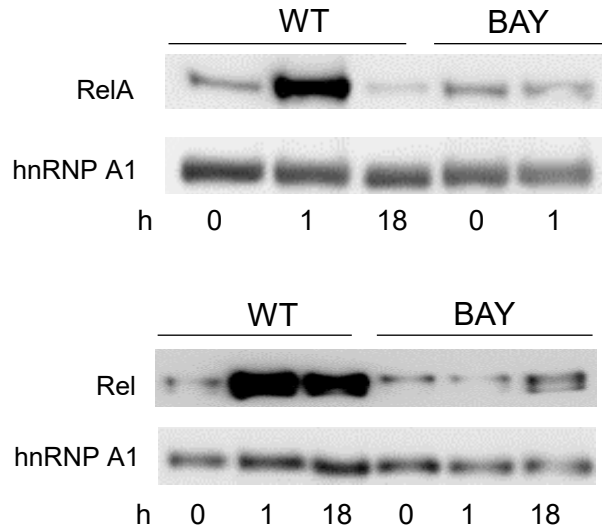

C

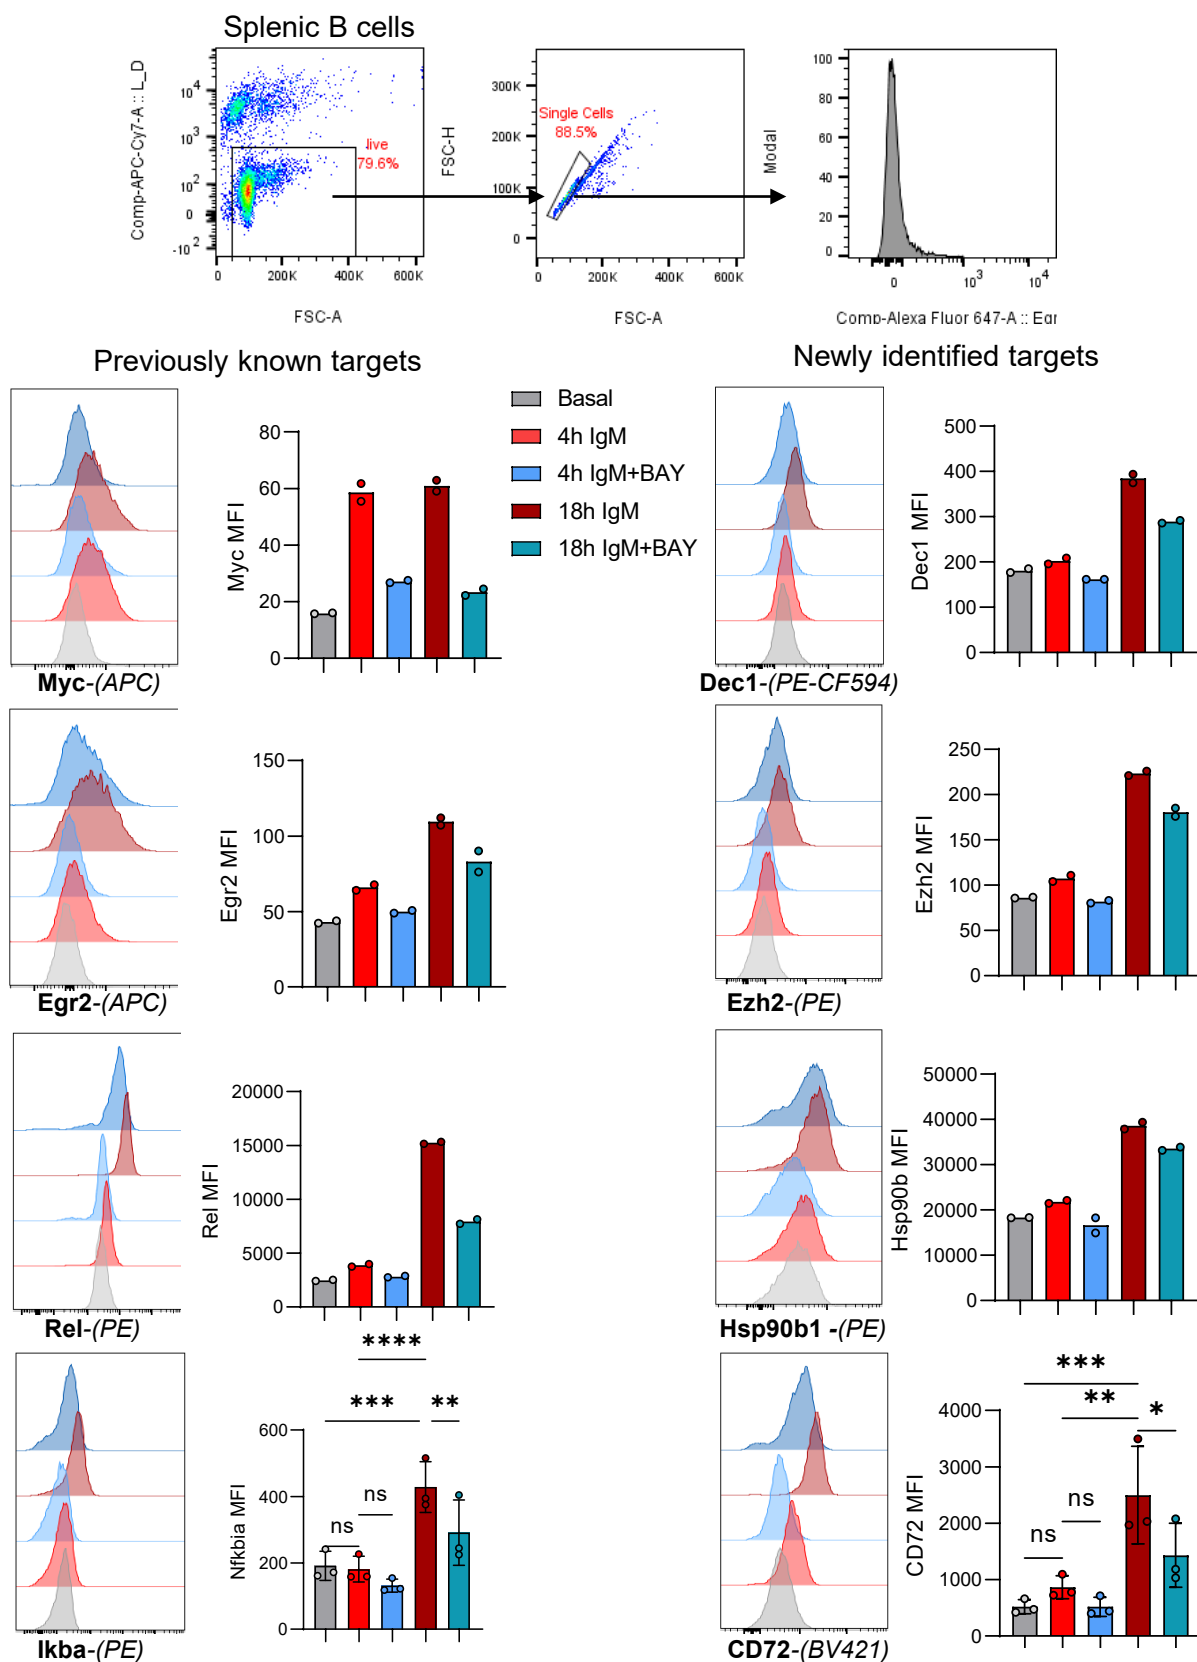

d

## Cluster-I3-(186)

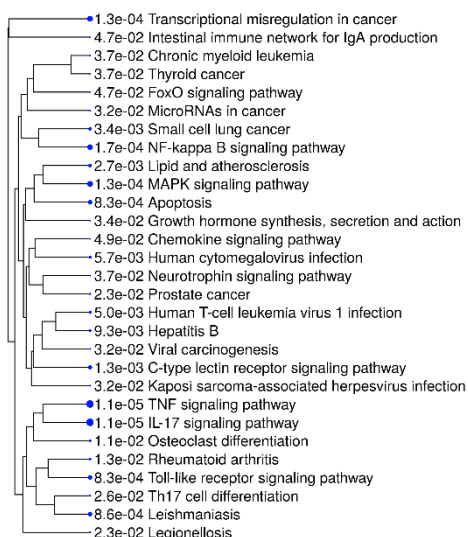

## Cluster-I1-(520)

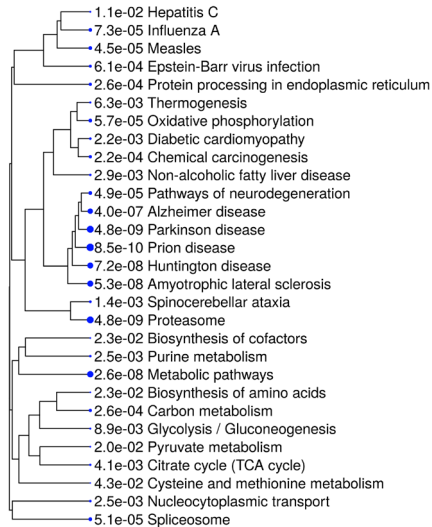

## Cluster-I6-(659)

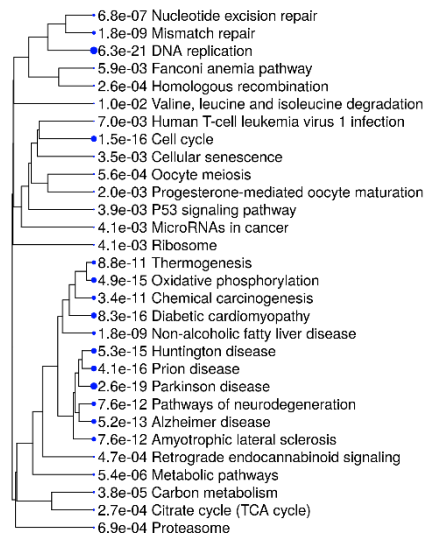

## Cluster-I3-(113)

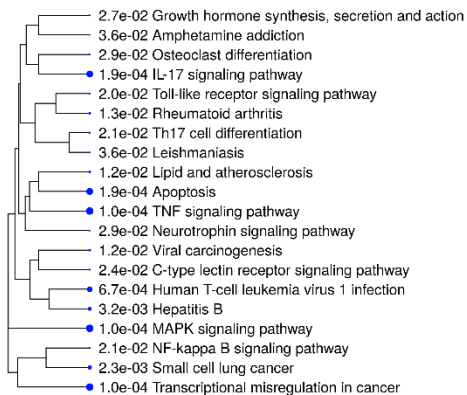

## Cluster-I1-(101)

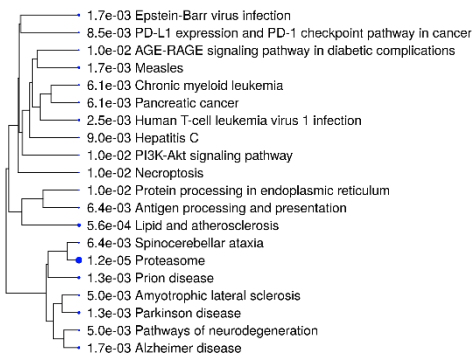

## Cluster-I6-(153)

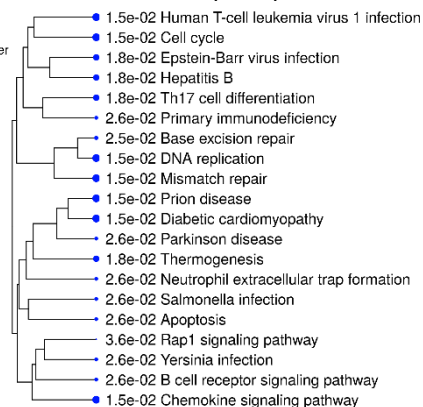

e

Upregulated 2-fold but not affected by inhibitor

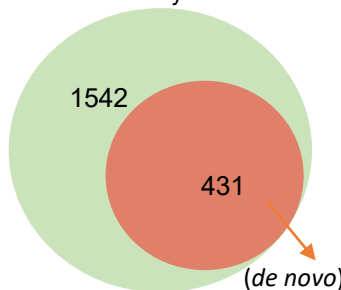

| Consensus sequence  | P-value | Motif Name |
|---------------------|---------|------------|
| <b>GGGAATTC</b>     | 1e-21   | NFkB-p65   |
| <b>CTCTCCAGCATG</b> | 1e-14   | ZBTB26     |

Downregulated 2-fold but not affected by inhibitor

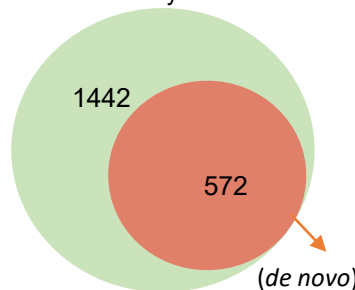

| Consensus sequence  | P-value | Motif Name |
|---------------------|---------|------------|
| <b>AGAGGAAGTG</b>   | 1e-42   | PU.1       |
| <b>GGGAAAACCCCS</b> | 1e-37   | NFkB-p65   |

f

Not changed in wild type

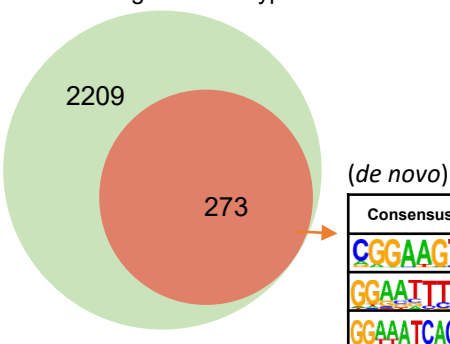

| Consensus sequence  | P-value | Motif Name |
|---------------------|---------|------------|
| <b>CGGAAGTG</b>     | 1e-26   | ETV6       |
| <b>GGAAITTC</b>     | 1e-23   | RELA       |
| <b>GGAAATCACCTT</b> | 1e-15   | REL        |

### Figure S3: Gene expression analyses in activated B cells.

**a**, Table of total reads and overall alignment rate, expressed as percentage of total, for 40 RNA-Seq samples including 20 biological replicates. RSEM was used to align samples to the mm9 reference genome. **b**, Kinetics of nuclear RelA and Rel induction in activated B cells in the presence or absence of the IKK2 inhibitor BAY11-7082. Nuclear extracts from splenic B cells treated with anti-IgM Fab`2, with or without inhibitor, for the indicated times (h) were probed with anti-RelA, anti-Rel or anti-hnRNP A1 (loading control) antibodies by western blot. Representative image of 3 experiments is shown. **c**, Gating strategy for identification of protein products of NF- $\kappa$ B target genes. Histograms and bar graphs representing mean of median fluorescence intensity (MFI) values are shown, left column known targets (Myc, Egr2, Rel: n=2, Ikba: n=3), right column newly identified NF- $\kappa$ B target genes (Dec1, Ezh2, Hsp90b1: n=2, CD72: n=3). For Ikba and CD72 error bar represent SEM and significance was measured using paired *t*-test, \*  $\leq 0.05$ , \*\*  $\leq 0.01$ , \*\*\*  $\leq 0.001$  and \*\*\*\*  $\leq 0.0001$ . **d**, KEGG pathways of gene clusters shown in Fig 3d. Top row – Hierarchically clustered pathways from all genes in cluster I3, I1 and I6. Bottom row - pathways from RelA- or Rel- binding genes of indicated clusters. Significant pathways were defined by an FDR of  $\leq 0.05$  - blue circle size in clusters indicates FDR values. **e**, Summary of NF- $\kappa$ B binding to genes whose inducible expression was unaffected by BAY11-7082. Top: 431 out of 1542 genes that were up-regulated  $\geq 2x$  by anti-IgM Fab`2 treatment bound Rel or RelA. *De novo* motif analysis underlying these NF- $\kappa$ B peaks using HOMER is shown to the right of the Venn diagram. Bottom: 572 out of 1442 genes that were downregulated by anti-IgM Fab`2 treatment bound Rel or RelA; corresponding HOMER analysis is shown to the right, with default setting for p-values in HOMER. **f**, RNA-Seq data representing expression of 2209 genes that did not change with anti-IgM Fab`2 and inhibitor treatment. Of these, 273 showed inducible RelA or Rel binding (orange circle). HOMER analysis of sequences underlying these peaks is shown to the right.

a

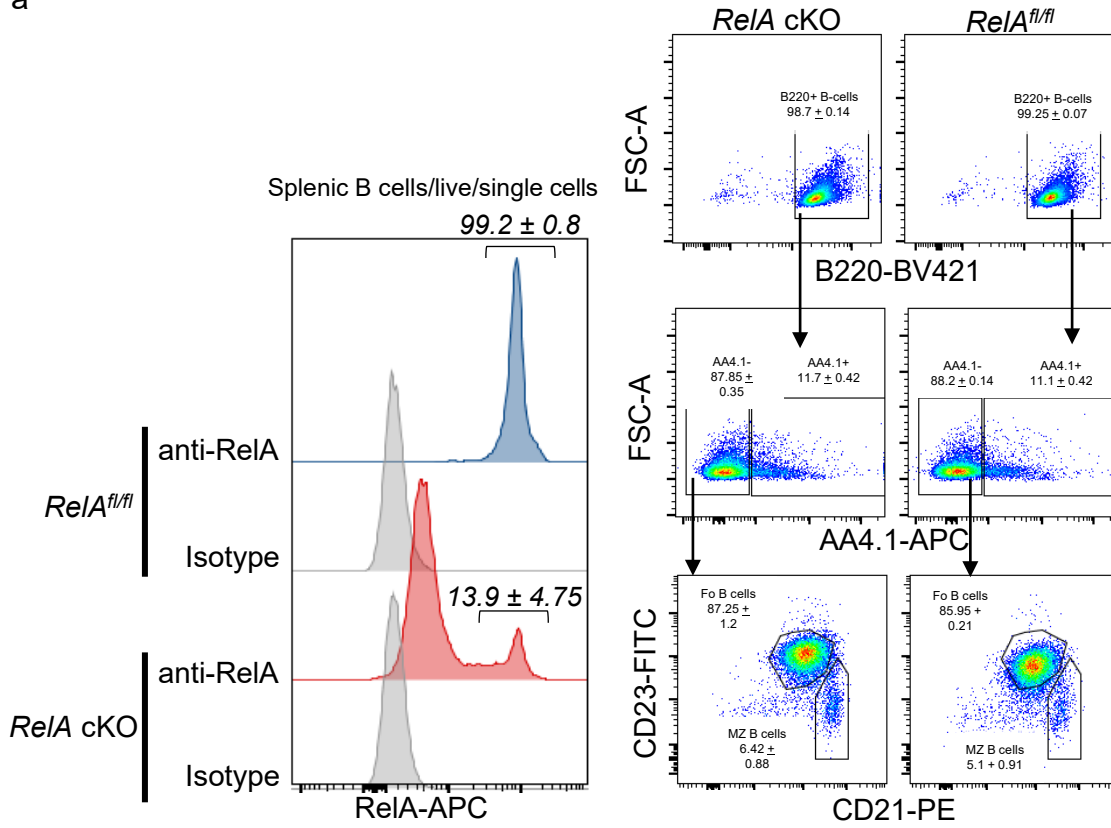

b

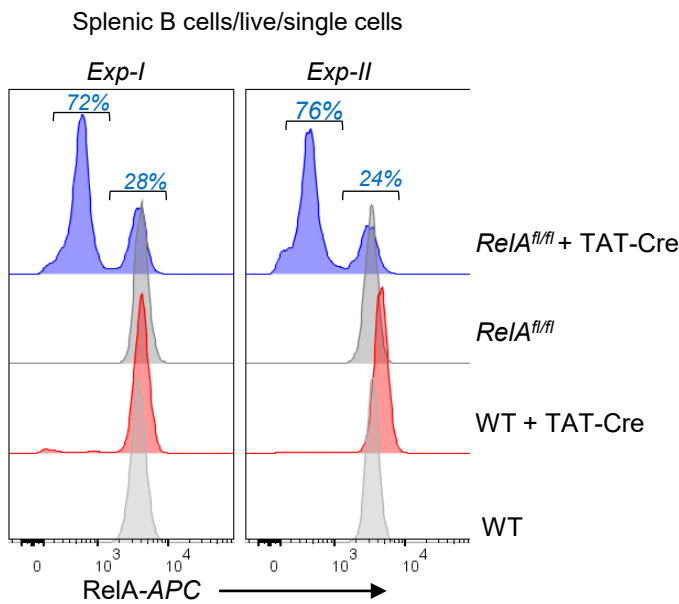

C

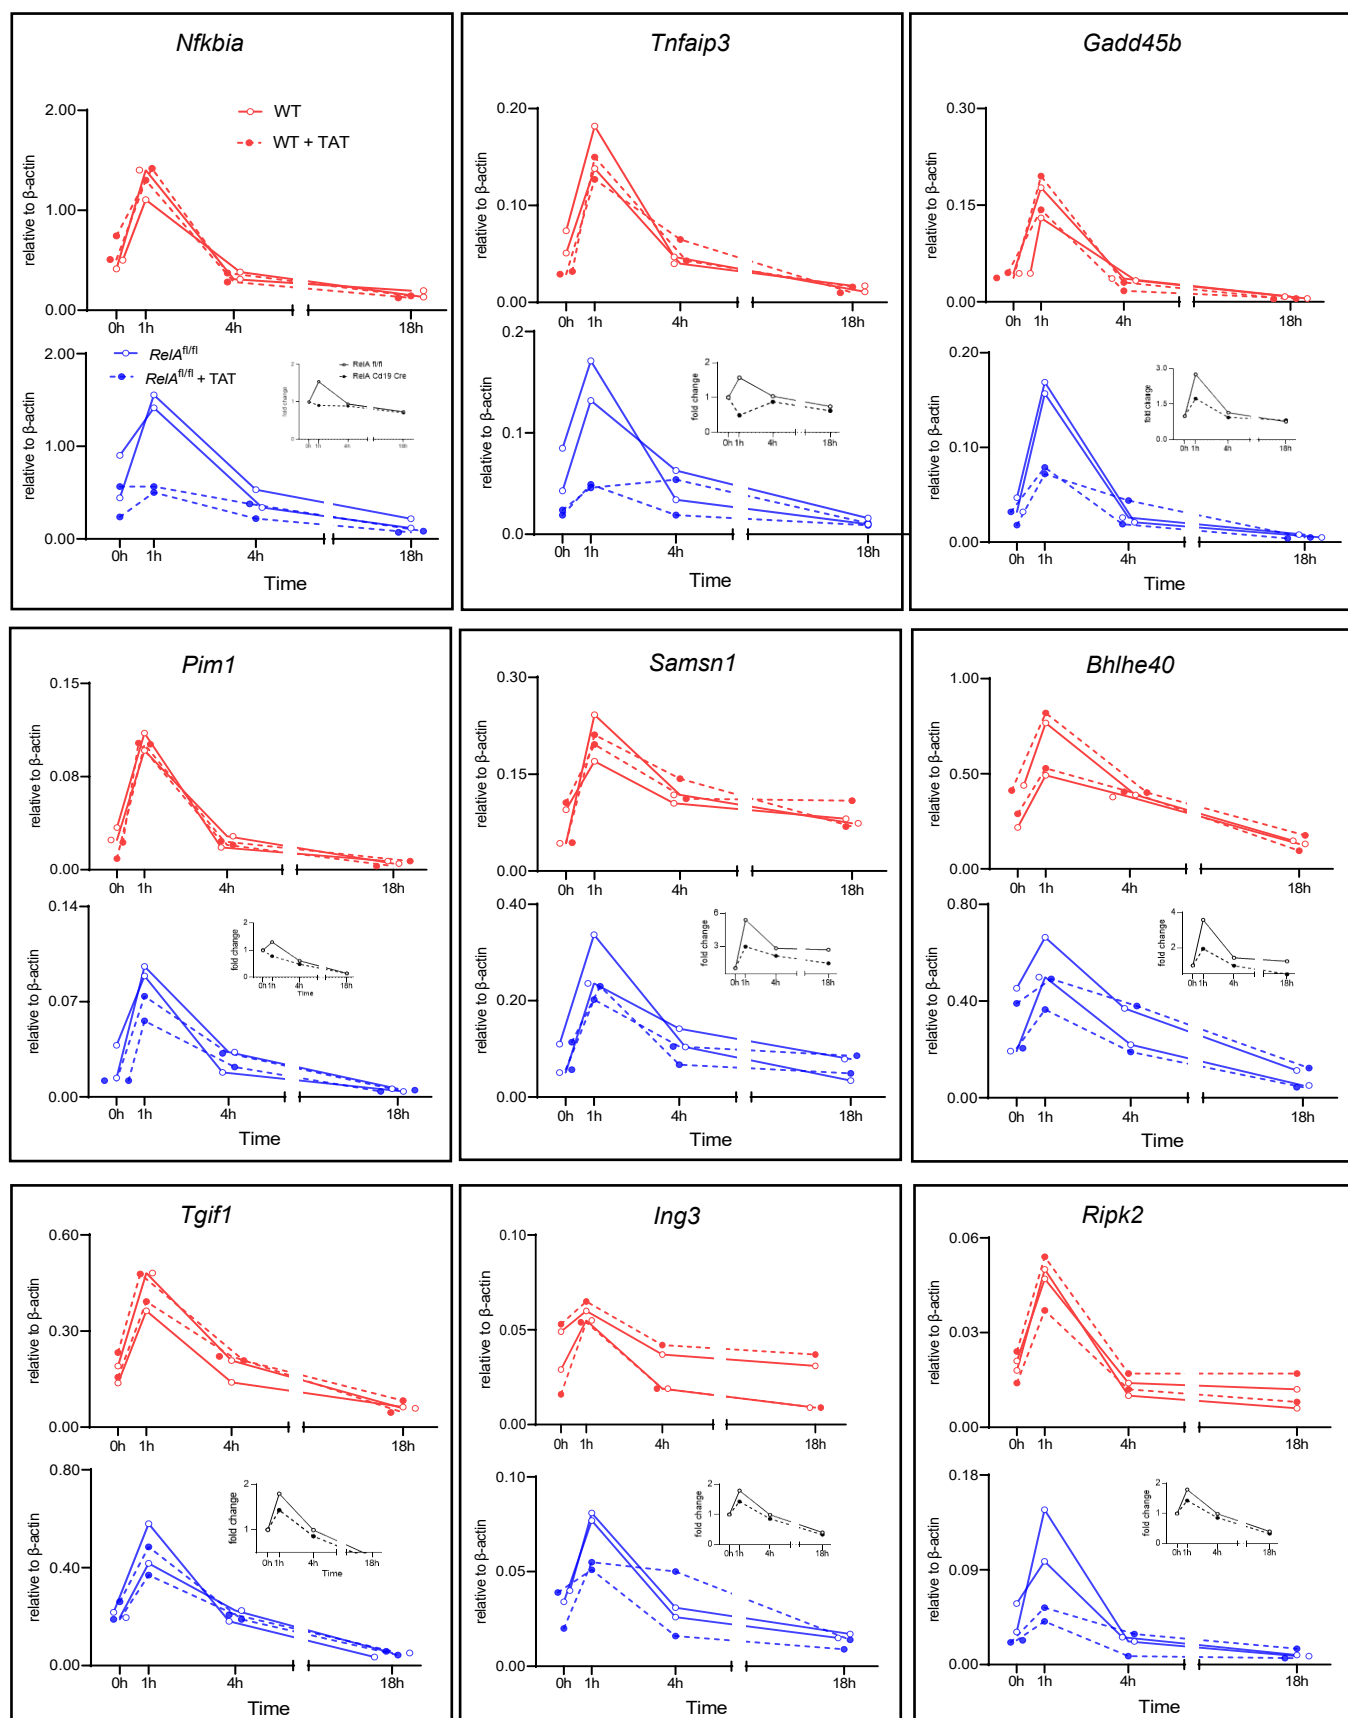

d

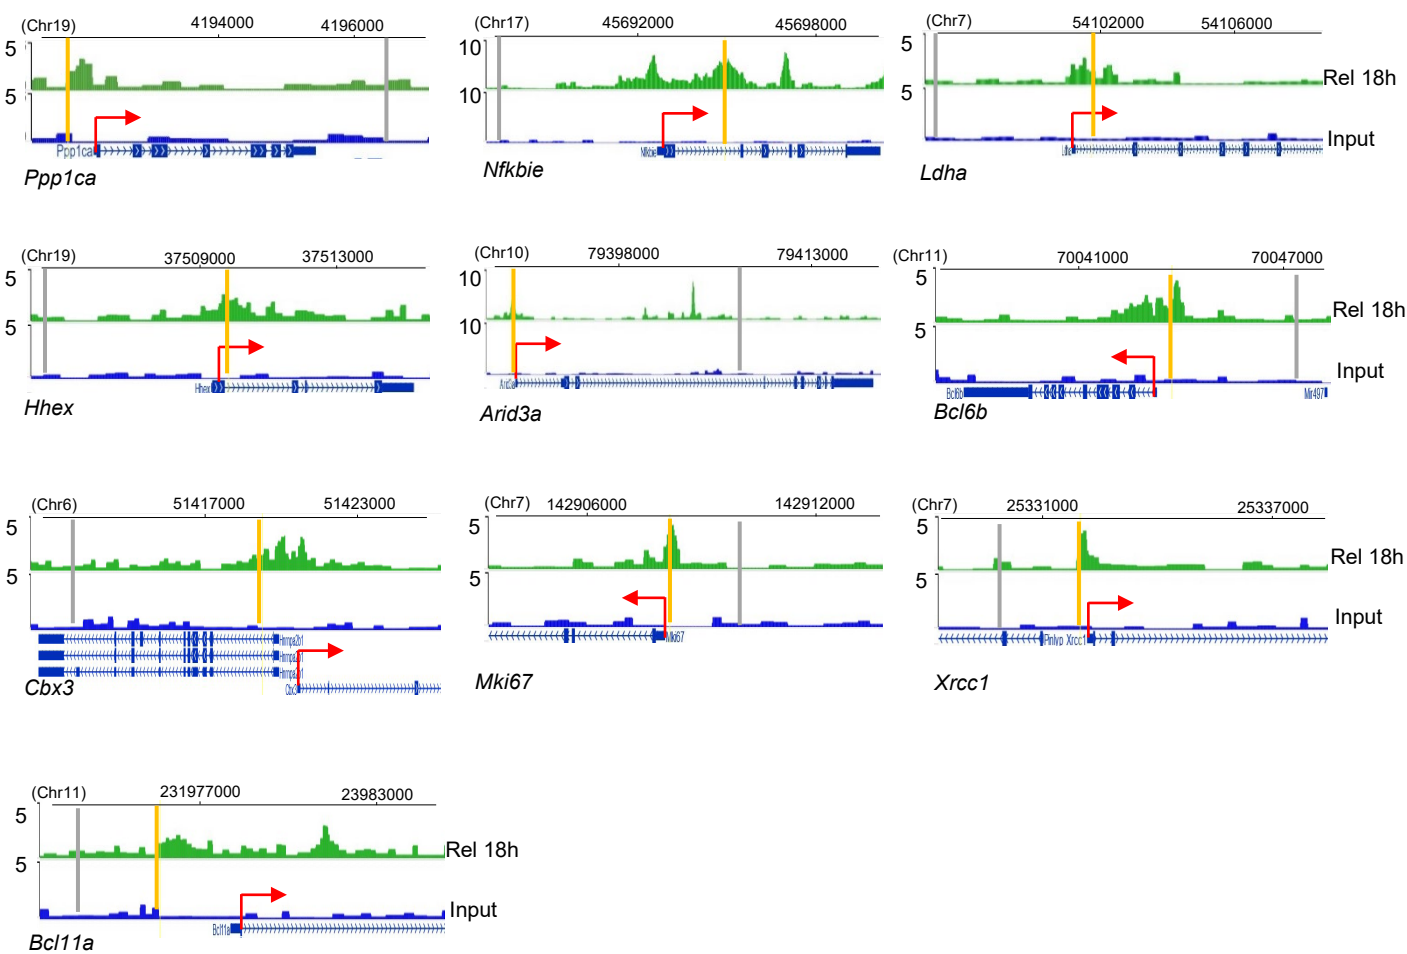

e

## Rel Targets

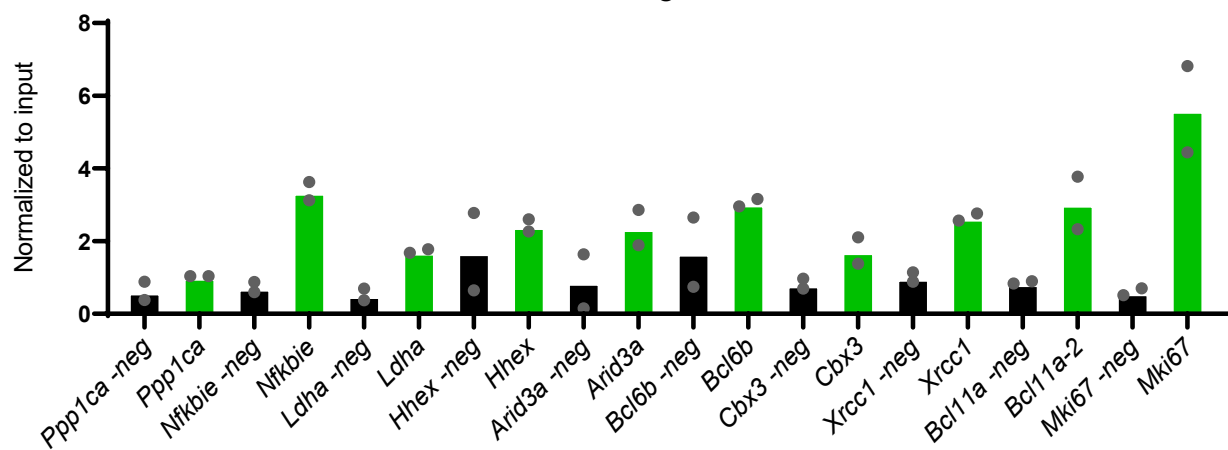



**Figure S4: Gene expression and ChIP analysis of RelA and Rel target genes.**

**a**, Flow cytometry analysis of RelA expression in splenic B cells of *RelA cKO* and *RelA<sup>fl/fl</sup>* mice (left) and scatter plots depicting the distribution of typical splenic B cell subsets (Fo = Follicular B cells; MZ marginal zone B cells) identified by markers, B220, AA4.1, CD23 and CD21 (right) (n=2; number represent mean value  $\pm$  STD). **b**, *Ex vivo* deletion of RelA in B cells using TAT-Cre. Histograms from 2 independent experiments representing RelA levels are shown. **c**, Gene expression of RelA selective genes in *ex vivo* RelA deleted B cells. TAT-Cre treated B cells of *RelA<sup>fl/fl</sup>* or C57BL/6 genotypes (Figure S4b) were stimulated with anti-IgM Fab`2 and qRT-PCR was done. Red graphs represent C57BL/6 (WT) and WT+TAT-Cre treated B cells; blue graphs represent *RelA<sup>fl/fl</sup>* and *RelA<sup>fl/fl</sup>* + TAT-Cre treated B cells. Black inset graphs represent the fold change values between *RelA<sup>fl/fl</sup>* and *RelA<sup>fl/fl</sup>* x *Cd19-cre* at 0, 1, 4 and 18h obtained from RNA-seq data shown in Figure 3e. Data for individual genes are represented as relative expression to  $\beta$ -actin (relative expression =  $2^{(CT(\beta\text{-actin}) - CT(\text{target gene}))}$ ). **d**, Representative browser tracks, based on mm9 annotation, of ChIP-Seq profiles of Rel target genes 18h after anti-IgM treatment. Yellow lines indicate the positive primer site, grey lines indicate negative control sites in each locus. The Y axis represents normalized reads per 10 million of aligned reads. **e**, Independent ChIP-PCR of Rel targets at 18h after anti-IgM treatment. Data shown are the average of 2 additional ChIP experiments, normalized to input value; grey bars represent negative control amplicons from Figure S4d.

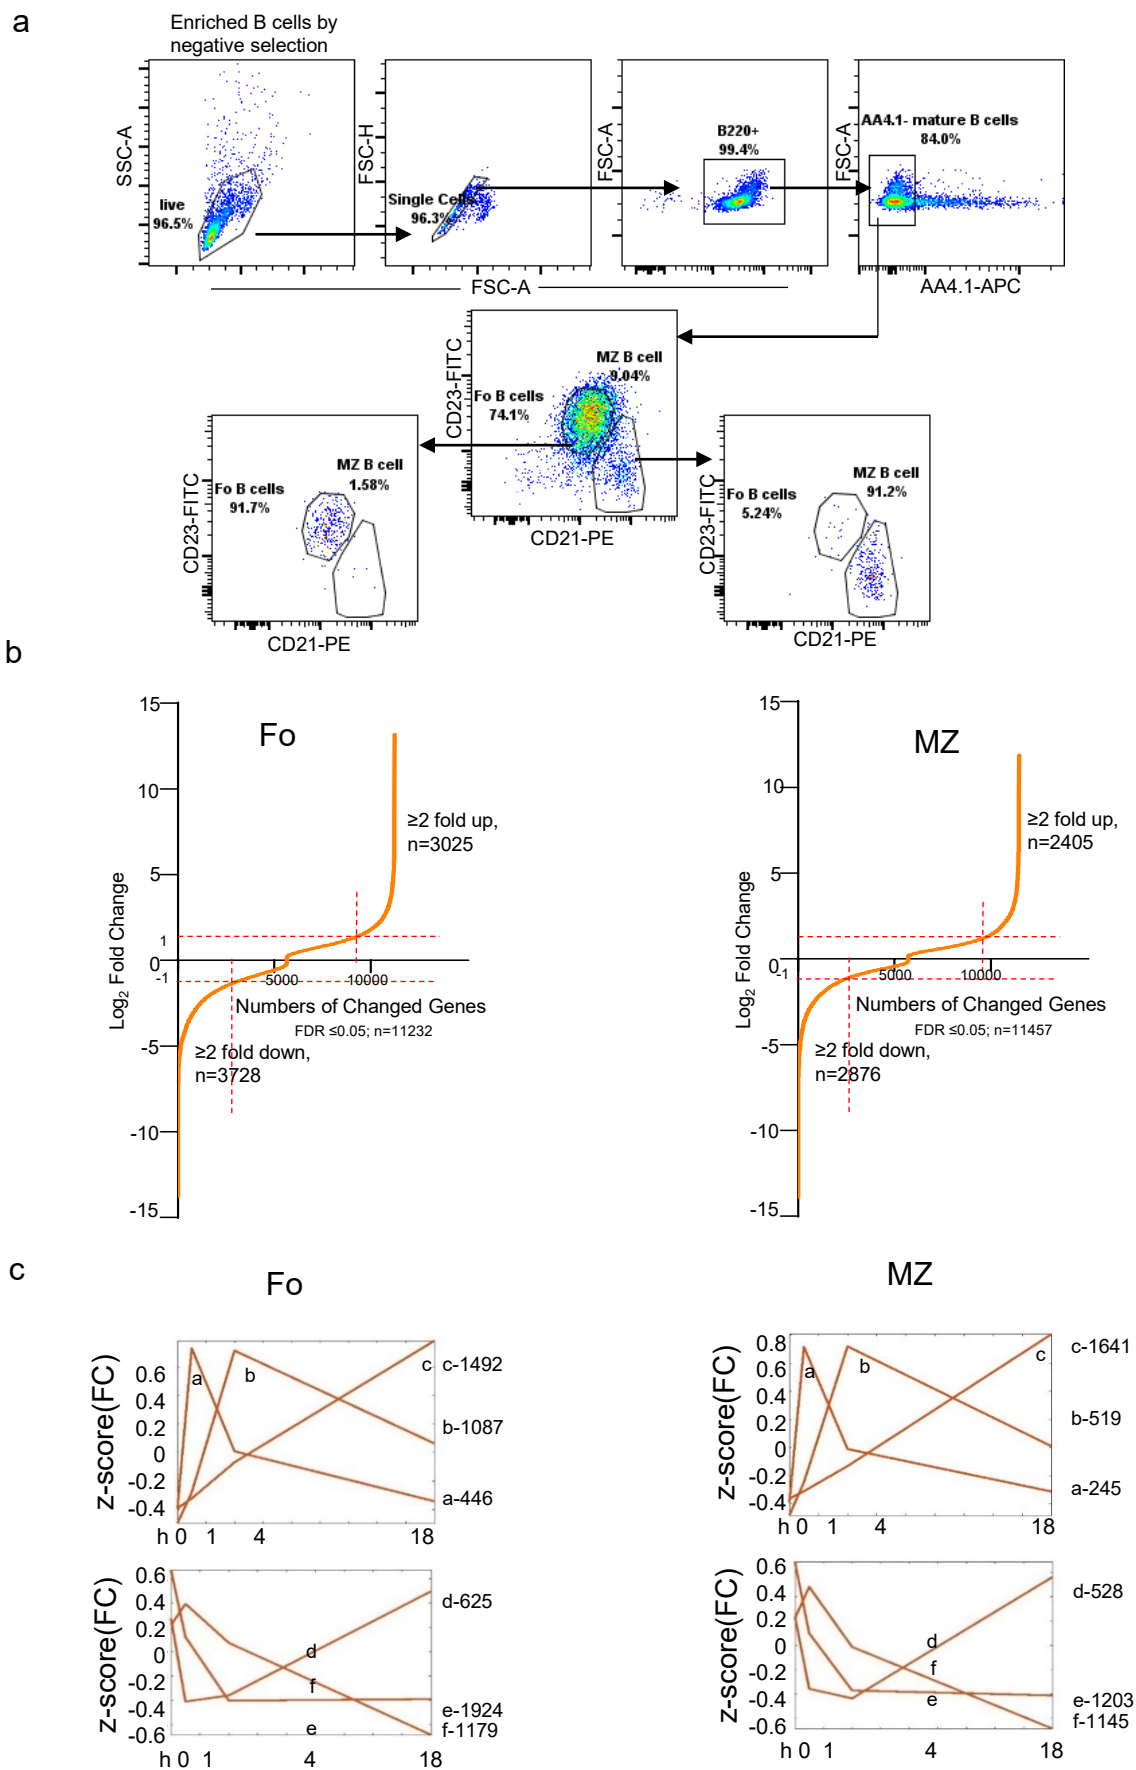

d

## Cluster-Fo-a(446 gene)

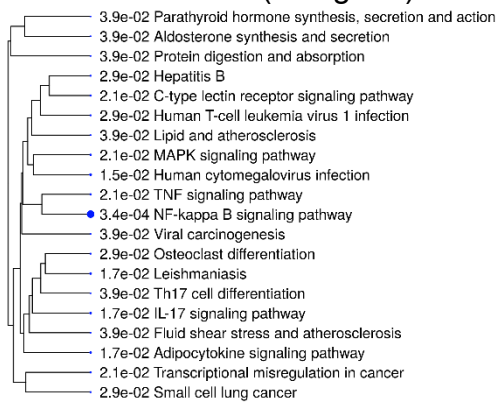

## Cluster-MZ-a(245 gene)

No significant  
KEGG pathway enrichment

## Cluster-Fo-b(1087 gene)

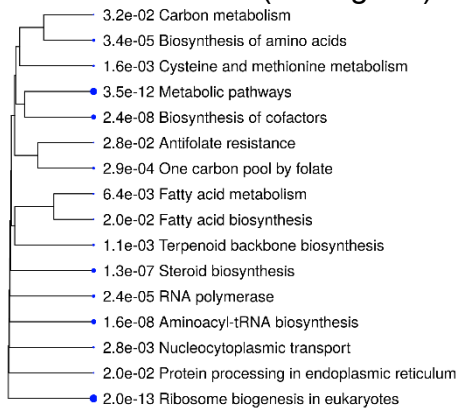

## Cluster-MZ-b(519 gene)

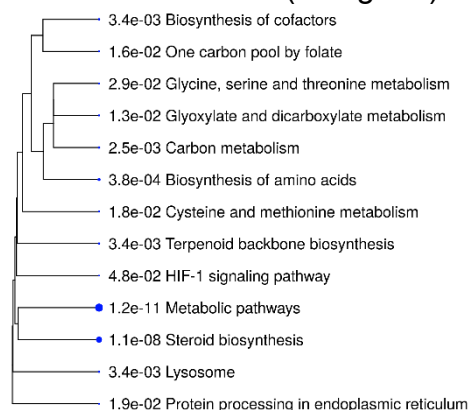

## Cluster-Fo-c(1492 gene)

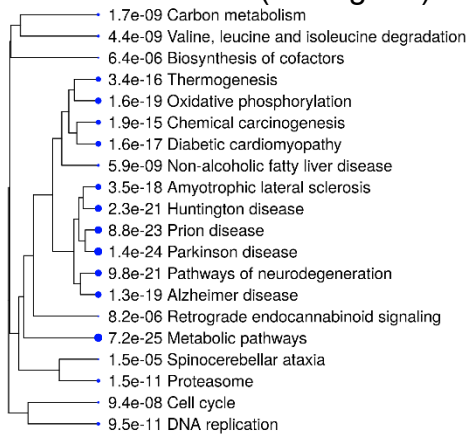

## Cluster-MZ-c(1641 gene)

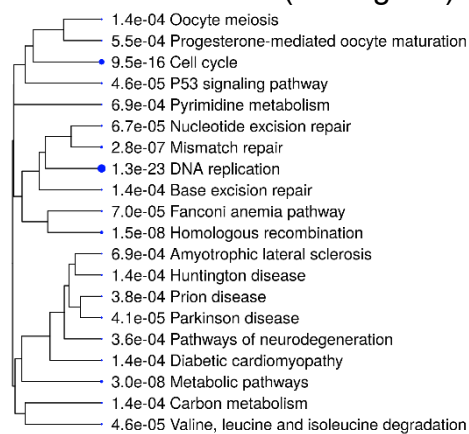

e

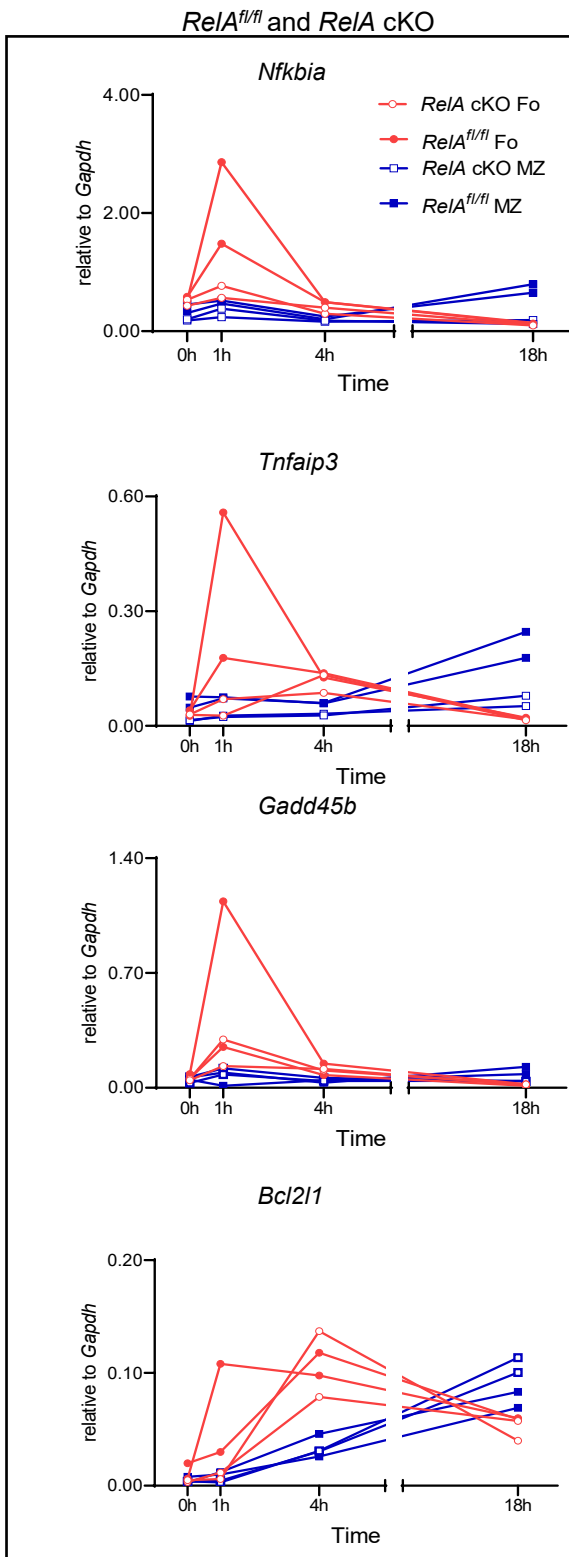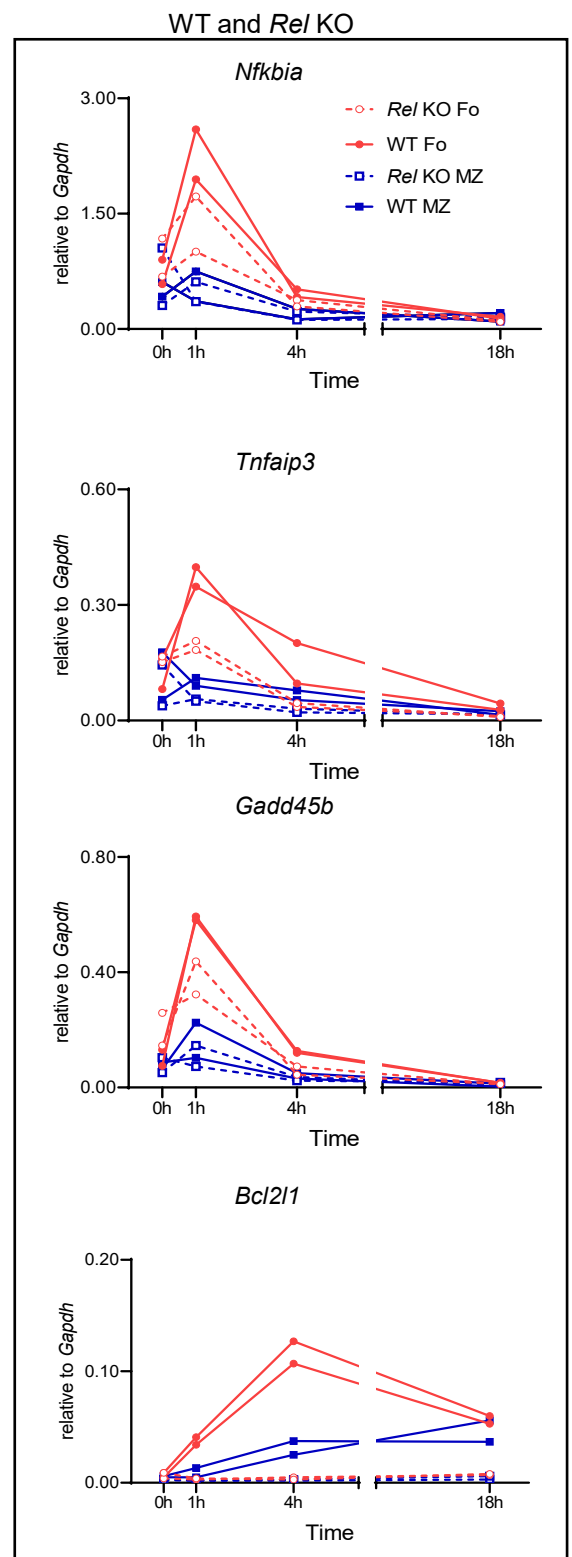

**Figure S5: Gene expression in follicular (Fo) and marginal zone (MZ) B cells.**

**a**, FACS sorting strategy for splenic Fo and MZ B cells isolation from negatively selected splenic B cells. Post sort purity is shown for Fo and Mz B cells (bottom panel). **b**, RNA-Seq was performed with RNA from Fo and MZ B cells activated with anti-IgM for 0, 1, 4 and 18h. Differential gene expression (using EBSeq -  $FDR \leq 0.05$ ) from two biological replicate experiments. Plot of  $\log_2$  fold changes in gene expression at either 1, 4 or 18 h post activation compared to un-activated cells in Fo (left) and MZ (right) cells. Horizontal red dotted lines correspond to fold change thresholds of  $\geq 2$ . Numbers of genes up- or down-regulated by  $\geq 2x$  are indicated. **c**, In both Fo (left) and MZ (right) cells, inducible transcripts were partitioned into 3 up (a-c) and 3 down (d-f) regulated kinetic patterns by k-means clustering. Each graph represents the centroid profile of the average of z-score of fold change (FC) compared with untreated cells at 1, 4, and 18 h. Total numbers of genes in each pattern are indicated on the right of each panel. **d**, Enriched KEGG pathways from Fo and MZ B cell genes from indicated k-means clusters in Fig S5c. Similar pathways are represented by hierarchical clustering.  $FDR \leq 0.05$  qualifies for significant pathways and blues circle size in clusters indicates FDR values. **e**, Gene expression analysis by qPCR in Fo and MZ B cells of *RelA* cKO and *Rel* KO mice after anti-IgM stimulation. Relative to *Gapdh* expression levels of indicated genes are shown. Left panel represents *RelA* cKO compared with *RelA*<sup>fl/fl</sup> and right panel are *Rel* KO compared with WT, (n=2).

a

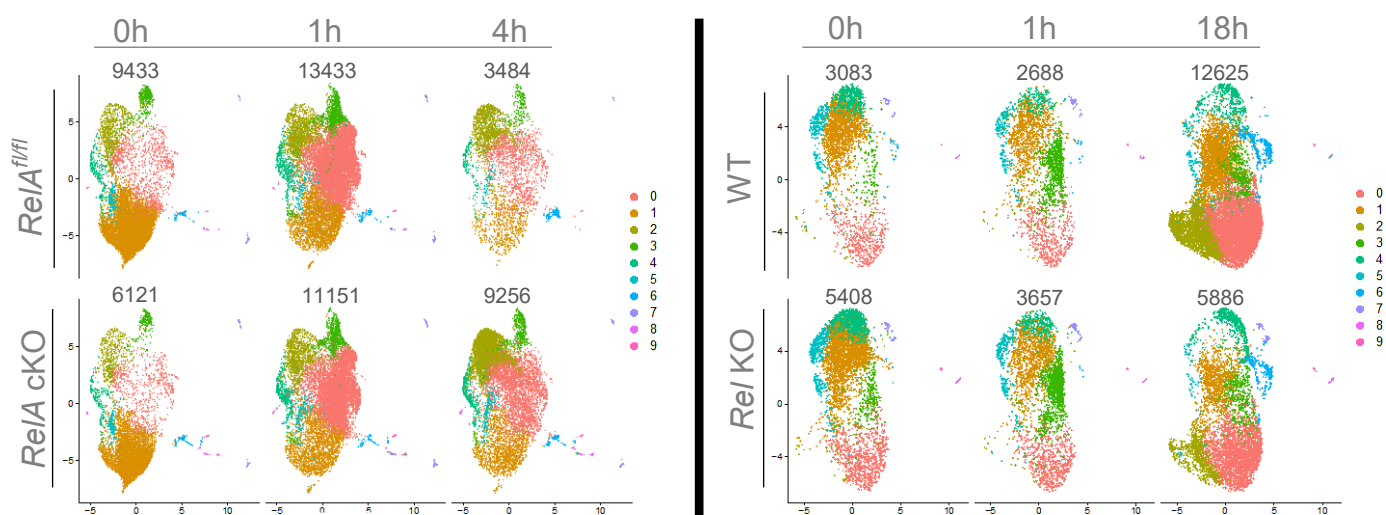

b

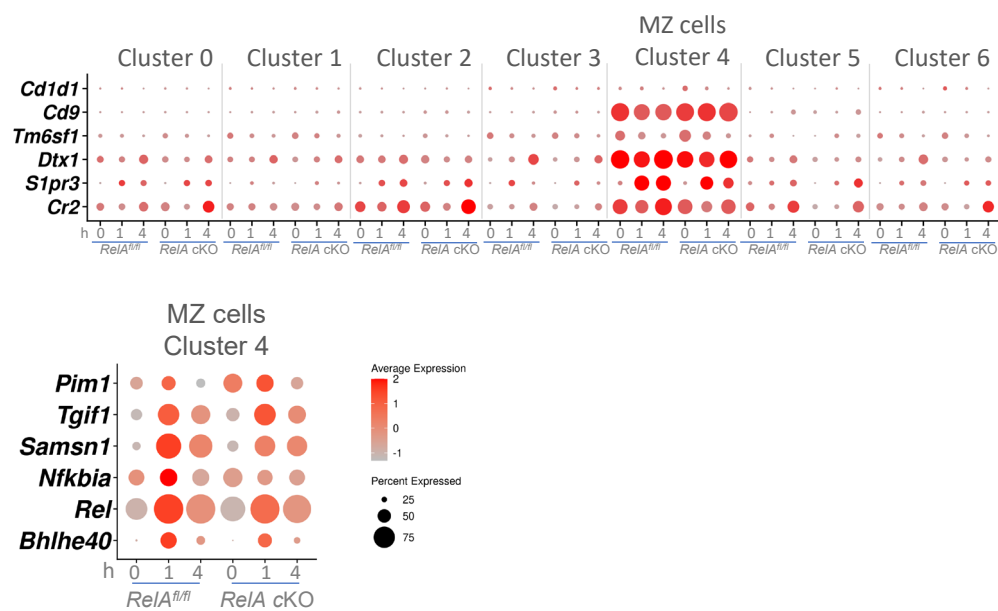

c

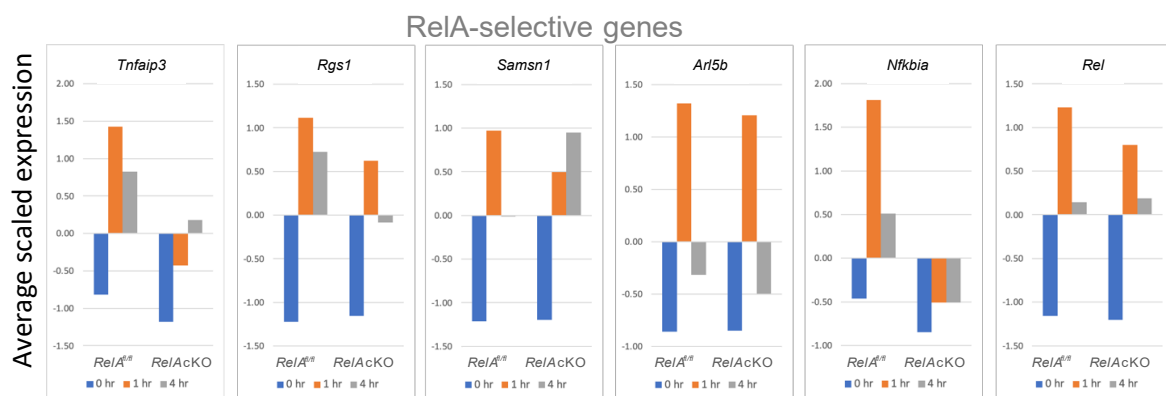

d

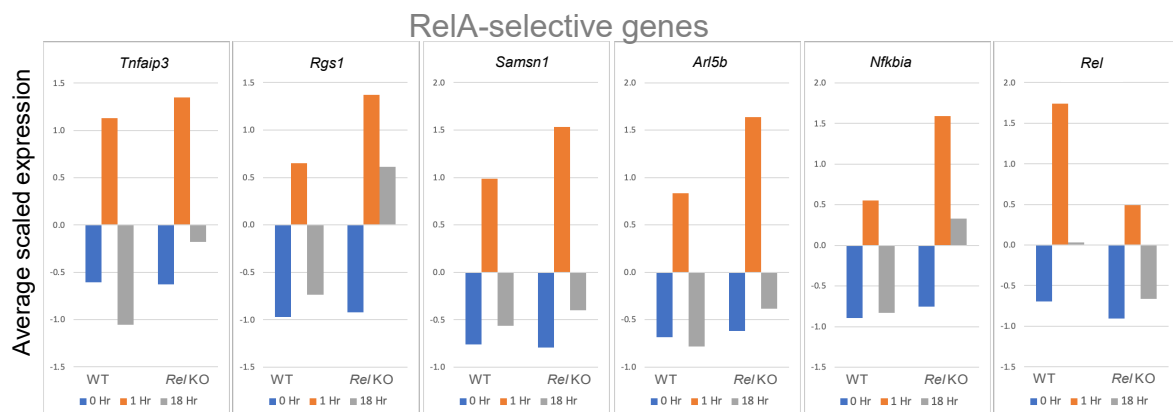

e

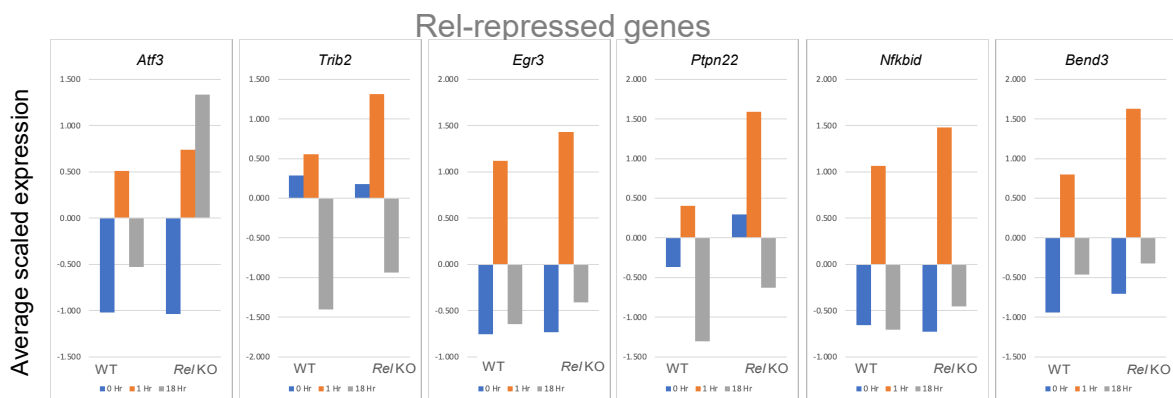

f

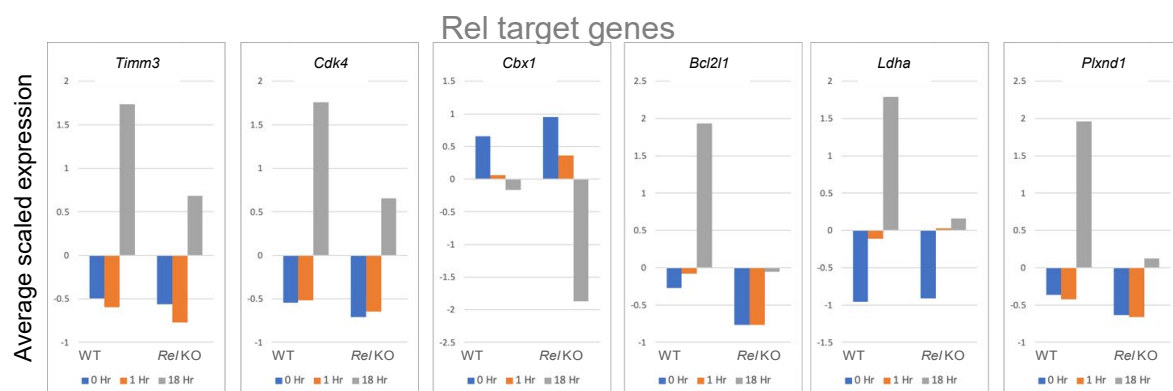

**Figure S6: Single cell Seurat analysis of B cell activation in  $RelA^{fl/fl}$ ,  $RelA$  cKO, WT and  $Rel$  KO cells.**

**a**, Seurat UMAP visualization of scRNA-Seq libraries generated from  $RelA^{fl/fl}$  and  $RelA$  cKO B cells at 0, 1, and 4h (left) and WT and  $Rel$  KO at 0, 1 and 18h post anti-IgM Fab`2 treatment. The graph-based cluster identities are defined by color in the key to the right of each UMAP set. The number of cells analyzed are indicated. **b**, Average expression and percent of  $RelA^{fl/fl}$  and  $RelA$  cKO cells that express marginal zone markers  $Cd1d1$ ,  $Cd9$ ,  $Tm6sf1$ ,  $Dtx1$ ,  $Slpr3$ , and  $Cr2$  (top) across clusters 0 - 6 of 11. Cluster 4 exhibits the strongest MZ signature. Expression of RelA-dependent genes  $Pim1$ ,  $Tgif1$ ,  $Samsn1$ ,  $Nfkb1a$ ,  $Rel$ ,  $Bhlhe40$  in cluster 4 (bottom) **c-f**, Scaled expression data is plotted as bar graphs for a subset of genes found in Figure 5 a-d after various induction times. **c**, RelA-selective genes in  $RelA^{fl/fl}$  and  $RelA$  cKO B. **d**, Expression of RelA-selective genes in WT and  $Rel$  KO B. **e**, Rel-repressed genes in WT and  $Rel$  KO B. **f**, Rel target genes in WT and  $Rel$  KO B cells.

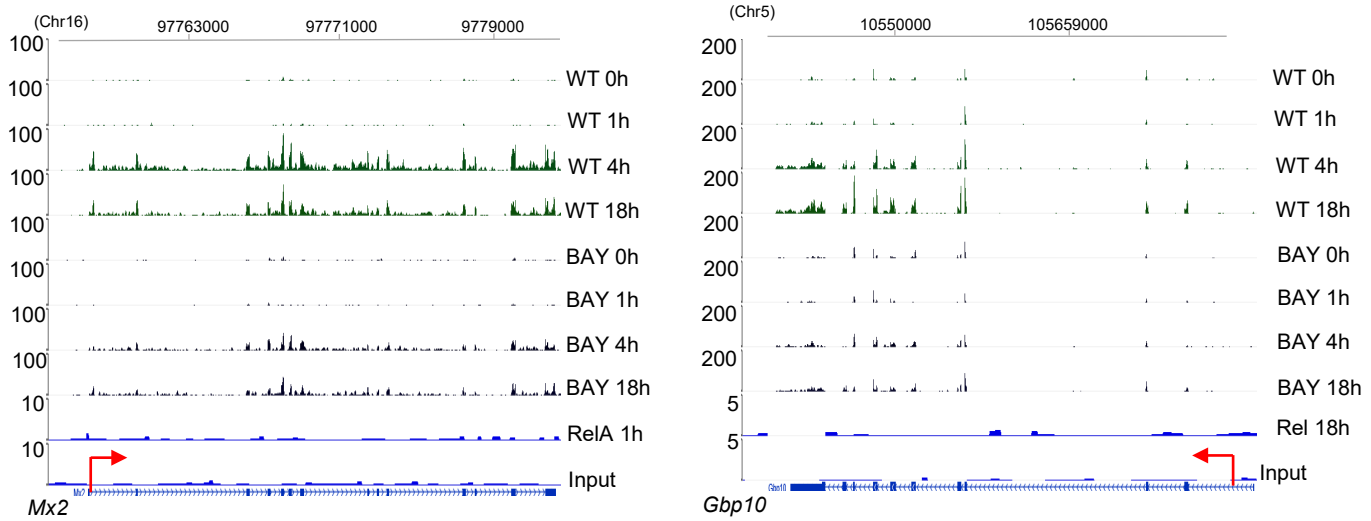

### Figure S7: Indirect NF- $\kappa$ B target genes

*Mx2* and *Gbp10* are examples of genes that are affected by inhibitor treatment but do not bind either RelA or Rel at any activation time point. The top 8 lines show RNA-Seq tracks at different times after anti-IgM Fab'2 treatment of spleen B cells from C57BL/6 mice in the presence or absence of BAY11-7082 treatment. The bottom 2 lines (including input track) show RelA 1h or Rel 18h ChIP-Seq tracks.



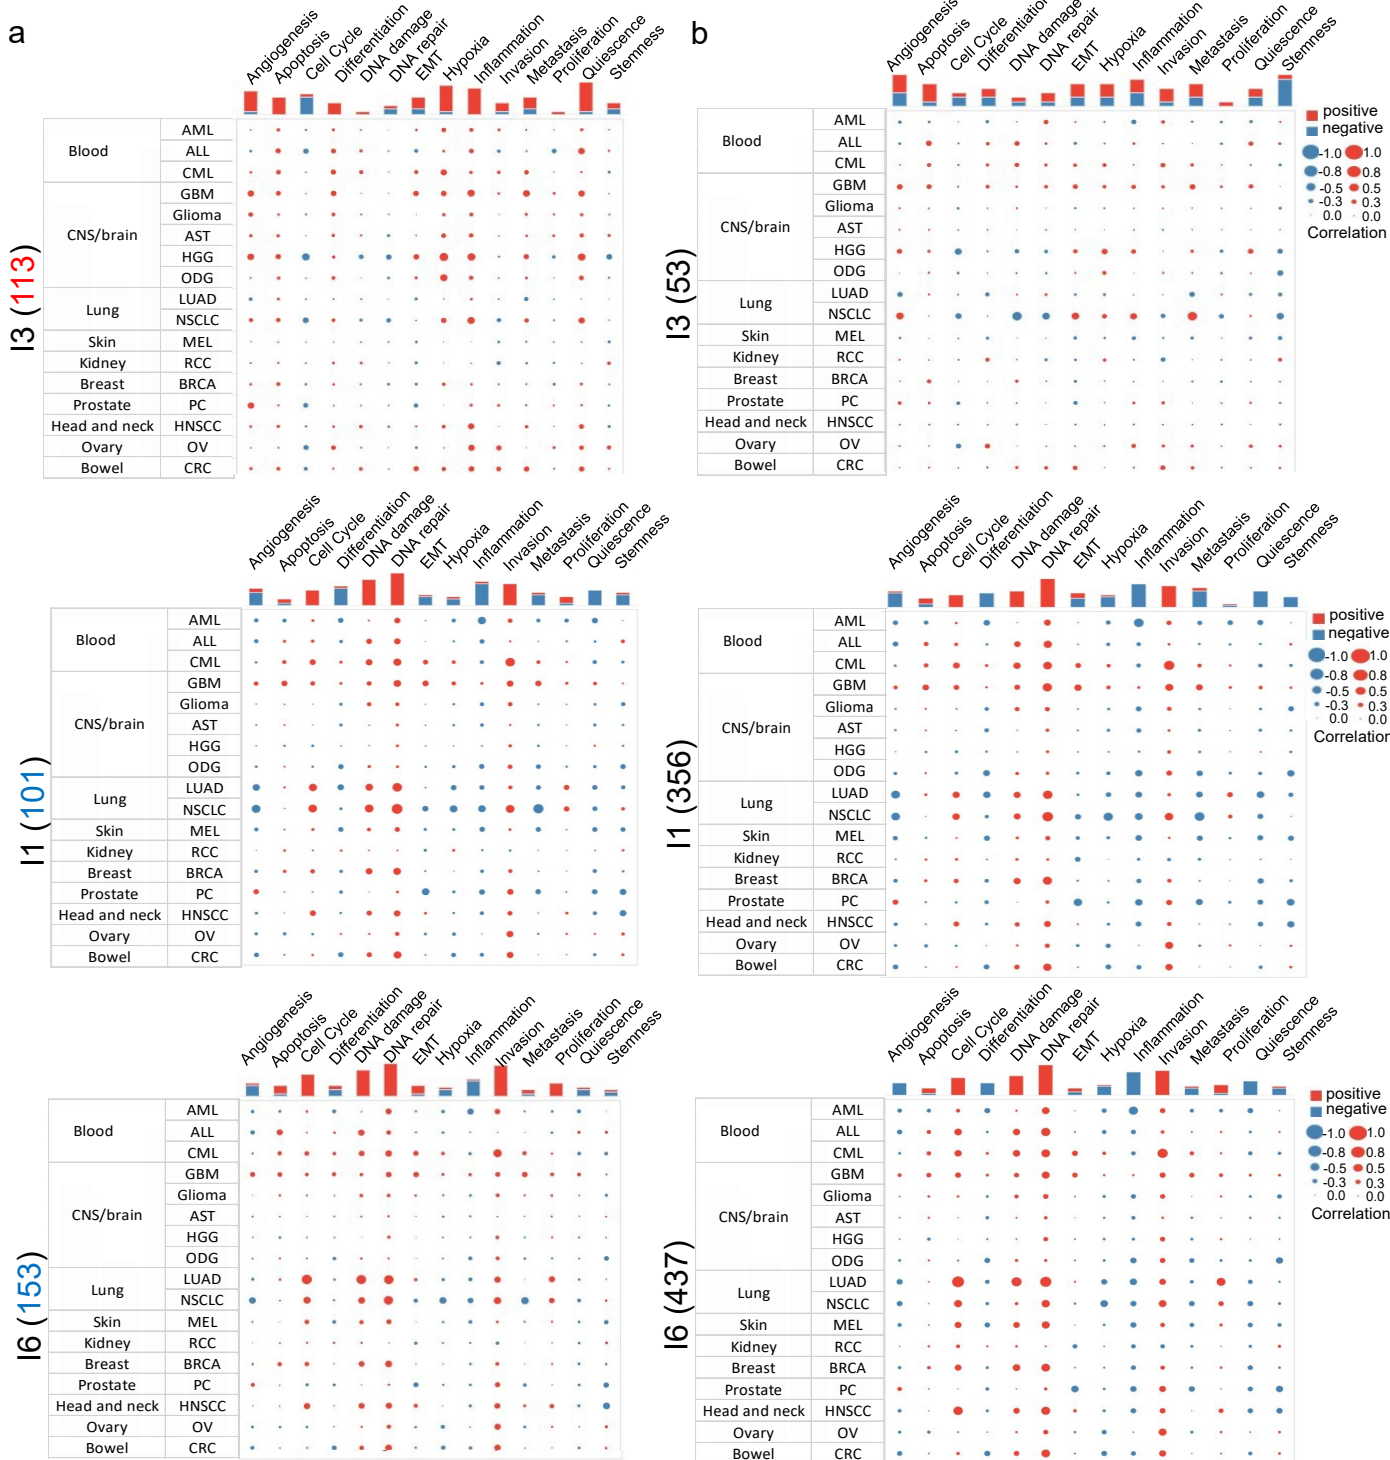

**Figure S8: Relationships of direct and indirect NF- $\kappa$ B target genes to cancer.**

**a**, Plots show average correlation of early [I3 (113)] or late [I1 (101) and I6 (153)] direct NF- $\kappa$ B target genes across 14 functional states in 10 cancer types by CancerSEA analysis. The dot size depicts the correlation strength average. The bar graphs illustrate the number of datasets in which the genes are significantly related to the associated function. Blue represents a negative correlation, while red represents a positive correlation. **b**, Relevance of early [I3 (53)] or late [I1 (356) and I6 (437)] indirect NF- $\kappa$ B target genes across 14 functional states in distinct cancers by CancerSEA analysis.

Source data for Figure S3 b

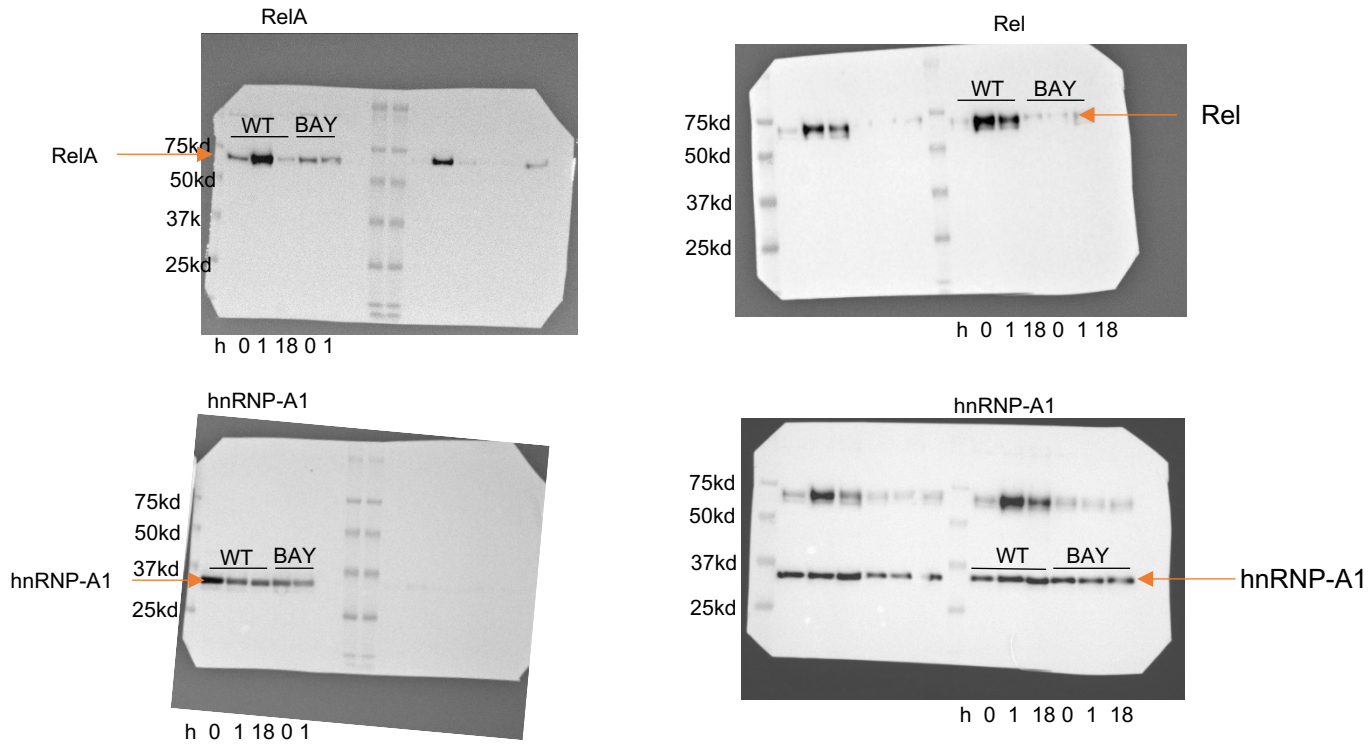

## Source data anti-Rel antibody validation

Western Blot on mouse B cell protein extracts for validation of anti-Rel antibody (cat no. sc-71, Santa Cruz Biotechnology), actin was used as a loading control. Lanes — are from other irrelevant mouse strains.

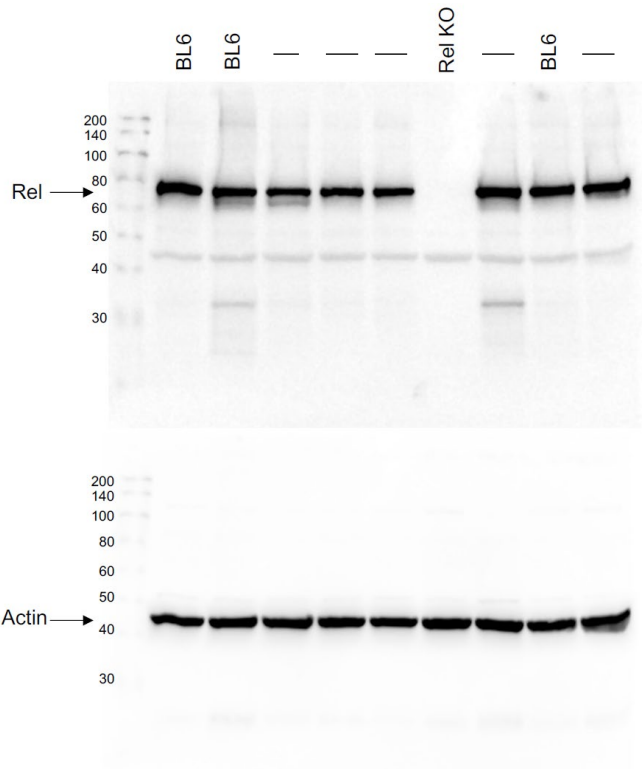

Supplement: 41590_2023_1561_MOESM1_ESM.pdf [file 41590_2023_1561_MOESM1_ESM.pdf]
