# Supplementary material for: NF-κB subunits direct kinetically distinct transcriptional cascades in antigen receptor-activated B cells
Source: PubMed Central journal article supplement (PMC10457194; doi:10.1038/s41590-023-01561-7), 2023-07-31
Supplement: 41590_2023_1561_MOESM4_ESM.pdf [file 41590_2023_1561_MOESM4_ESM.pdf]

## ChIP-PCR primers

| Main Figures       |                         | Supplementary Figures |                        |
|--------------------|-------------------------|-----------------------|------------------------|
| Figure 1c          |                         | Figure S1c            |                        |
| <u>Primer Name</u> | <u>Sequence</u>         | <u>Primer Name</u>    | <u>Sequence</u>        |
| Bach2-F            | GCCACTTACTTGGGAAAATG    | Bcl2l1 F              | CCGAGACGCAAAAAGGAGT    |
| Bach2-R            | GACAACCTGCCAACGTCTTGA   | Bcl2l1 R              | GGGACAGATGGATGAAGGAA   |
| Bcl2l1-F           | GTTGCCACACAAAAGTCAAG    | Nfkb1a-F              | CTGAGTGGCTGGAAAGTCCT   |
| Bcl2l1-R           | TTGCCATCATAGGGTTTTCC    | Nfkb1a-R              | CTGGCAAATCGCTAAGAGG    |
| Ccl3-F             | AGGTCAGGTGCTCTCTCAGC    | Negative-control-F    | GCCATCTTTCTACCTCCACA   |
| Ccl3-R             | GAGCCCTCGAAGTGTGACTC    | Negative-control-R    | CTCTGTCTGCCCTGTTAT     |
| Cdc274-F           | CTTTCCTCATTCCCCTTCA     | Figure S4e            |                        |
| Cdc274-R           | CTGCGTGGGTCTGGAGTTA     | <u>Primer Name</u>    | <u>Sequence</u>        |
| Dennd4a-F          | CCTTTTCCCTGACCTCTGTCT   | Arid3a-F              | GGGGTTTTTAAGCCCATTTT   |
| Dennd4a-R          | TCCTCTTTCACAAGCATCCA    | Arid3a-R              | GCAAGATGGATAAGCCAAGC   |
| Etv6-F             | TGTTACTTCTGTCCCCACCA    | Arid3a-neg-F          | TAGACGGGGAATCTGGACAC   |
| Etv6-R             | TCCAATTCCAATTCTCTCTT    | Arid3a_neg_R          | GTCGGGTGAGCAACAAAGA    |
| Gm14005-F          | CAGGCACAATGACATCTGCT    | Bcl11a-F              | CATTTGGTGATTCTAAGGCTGA |
| Gm14005-R          | CTCTGACTCAACGGGGAAAC    | Bcl11a-R              | GGTTTGAGGAGCAGGAAGAC   |
| Gm20098-F          | GTGACTTCCGCTCTGTAGCA    | Bcl11a-neg-F          | GTTGCTGGAGGTGGGTGTA    |
| Gm20098-R          | GGCAACCTATCTCTGTGTGG    | Bcl11a-neg-R          | GCAGTCTATGGTGAGAGTTGA  |
| Gpr132-F           | GAACCTCCCTAACCAACAG     | Bcl6b-F               | AGTGGGAGAAGGAGGAGTGA   |
| Gpr132-R           | CCTGAGAAGAGCCATCATCC    | Bcl6b-R               | GGACAATGGAAGGAAACGAA   |
| Klf10-F            | AGACGGGAGCACTGAGACA     | Bcl6b_neg_F           | GGACAGGAGGAAAGGGCTAT   |
| Klf10-R            | ACACCTTTGCCGCTGATT      | Bcl6b_neg_R           | CCCACACAGCAACTCTATT    |
| Mcl1-F             | GGAAAGGGTGGGATGTCA      | Cbx3-F                | GAGGAAGGAGACGGGAAAAT   |
| Mcl1-R             | TGCCTGAGAAGAAAAGCAAG    | Cbx3-R                | TAGGGGCTCGTTGTGTT      |
| Mcm9-F1            | TGGAATCGCCTCAAAGAAC     | Cbx3-neg-F            | ACAGTCTTTGTGGCAGCAGA   |
| Mcm9-R1            | TGCTTCAACCTCCCTTG       | Cbx3_neg_R            | TTCTACCCCTCCCTTT       |
| Nfkb1a distal-F    | AACTGGCTCGTCCCTCACT     | Hhex-F                | AAGCGCAGTGAAAAAGTTG    |
| Nfkb1a distal-R    | CACTCAGGGCTCATCAAAAAG   | Hhex-R                | AAGGTGCAGGAAAAGCAATC   |
| Pdcd1lg2-F         | ACGACTGCTTGGGGAAGTT     | Hhex-neg-F            | ACCTCAACAGGCGATGACTT   |
| Pdcd1lg2-R         | CACCTGGGGATGACTCTAA     | Hhex_neg_R            | CCAGCCACAAAGATGGAAT    |
| Psm6-F             | TGTGGGCTTTGCTAAACAGA    | Ldha-F                | AAGAGTCGAGTCCTTCTCT    |
| Psm6-R             | TGCCTCGATGGAAAGTTTG     | Ldha-R                | TCTACTTCACGCAAACTCAA   |
| Slamf6-F           | CAGACACACAACCTGGCACTACA | Ldha_neg_F            | TTGCGTCAGGGAAATGTATG   |
| Slamf6-R           | AACCGAAGGTGGAACATCC     | Ldha_neg_R            | AAGGTCGTGGGAAAGATGG    |
| Stim2-F1           | TGGCTTCTTGGGTTGGTAAT    | Mki67-F               | AAAACGGCGGTTCAAATTC    |
| Stim2-R1           | CCTCTCTCCTTGGTCTTTG     | Mki67-R               | CCTCTGGACTTCCCAATC     |
| Tnfaip3-F          | TGATGGGAACTGGAAATGC     | Mki67-neg-F           | AGAGAGACACACTCAGGATGGA |
| Tnfaip3-R          | CTGTGTGTCTGGGTGGTTTTT   | Mki67-neg-R           | TGTTGGGGAAGGATTAGGAG   |
| Tpd52-F            | ATGACCCAGAGGAAATGGAA    | Nfkb1e-F              | ATGATGGCTTGTGTGGAATG   |
| Tpd52-R            | CAGCCAGTGAGCCTAATCAA    | Nfkb1e-R              | AACAGGGAGGACAGGAGGA    |
| Zfp619-F           | GGTTTACGAGGATTCAACAAGG  | Nfkb1e_neg_F          | CTCAGCCTCAACTCTCTCC    |
| Zfp619-R           | AGACCTGGGAGGGTTTCAGT    | Nfkb1e_neg_R          | TCTCTTCTCCCAGCCTTC     |
|                    |                         | Ppp1ca-F              | GAGAAGTCAGCGATTAACATGC |
|                    |                         | Ppp1ca-R              | GCCGCGTTCAGATGAGTTA    |
|                    |                         | Ppp1ca-neg-F          | TCTGAGGAGGGCTTGGAGGT   |
|                    |                         | Ppp1ca_neg_R          | CAAAAGGGTTCAGTTCCAC    |
|                    |                         | Xrcc-1-F              | CACGTAGGACCCAATCACTG   |
|                    |                         | Xrcc-1-R              | CTCAGGTTCCACCACTCTCC   |
|                    |                         | Xrcc1_neg_F           | ATTTCAACCTCCCCTGATT    |
|                    |                         | Xrcc1_neg_R           | GAGCGAGTCCAGCAAAAGTA   |
