# Supplementary material for: NF-κB subunits direct kinetically distinct transcriptional cascades in antigen receptor-activated B cells
Source: PubMed Central journal article supplement (PMC10457194; doi:10.1038/s41590-023-01561-7), 2023-07-31
Supplement: 41590_2023_1561_MOESM8_ESM.pdf [file 41590_2023_1561_MOESM8_ESM.pdf]

**Fig S4c: Gene expression of RelA selective genes in ex vivo RelA deleted B cells**

**Experiment 1**

|             |             | WT 0h | WT 1h | WT 4h | WT 18h | WT+TAT 0h | WT+TAT 1h | WT+TAT 4h | WT+TAT 18h |
|-------------|-------------|-------|-------|-------|--------|-----------|-----------|-----------|------------|
| Replicate 1 | Bactin      | 19.13 | 19.16 | 18.74 | 18.32  | 19.50     | 19.42     | 18.26     | 17.62      |
| Replicate 2 | Bactin      | 19.14 | 18.76 | 18.63 | 18.23  | 19.41     | 19.46     | 18.39     | 17.67      |
| Replicate 1 | Nfkbia      | 20.15 | 18.73 | 20.06 | 21.17  | 20.13     | 18.94     | 19.73     | 20.31      |
| Replicate 2 | Nfkbia      | 20.14 | 18.90 | 20.09 | 21.19  | 19.66     | 18.93     | 19.77     | 20.54      |
| Replicate 1 | Tnfaip3     | 22.77 | 21.44 | 23.14 | 24.80  | 24.11     | 22.23     | 22.87     | 23.52      |
| Replicate 2 | Tnfaip3     | 22.89 | 21.39 | 23.07 | 24.86  | 24.13     | 22.12     | 22.87     | 23.65      |
| Replicate 1 | Gadd45b     | 23.42 | 22.01 | 23.50 | 25.83  | 24.01     | 22.33     | 24.21     | 25.35      |
| Replicate 2 | Gadd45b     | 23.65 | 21.80 | 23.75 | 26.19  | 24.01     | 22.16     | 24.20     | 25.20      |
|             | Target name | WT 0h | WT 1h | WT 4h | WT 18h | WT+TAT 0h | WT+TAT 1h | WT+TAT 4h | WT+TAT 18h |
| Replicate 1 | Bactin      | 19.24 | 18.78 | 18.95 | 19.16  | 19.63     | 19.09     | 18.94     | 18.67      |
| Replicate 2 | Bactin      | 19.14 | 18.93 | 19.27 | 19.43  | 19.52     | 19.10     | 18.82     | 18.74      |
| Replicate 1 | Pim-1       | 24.06 | 22.04 | 24.83 | 26.78  | 25.24     | 22.45     | 24.43     | 26.10      |
| Replicate 2 | Pim-1       | 23.95 | 21.85 | 24.95 | 26.25  | 24.88     | 22.33     | 24.24     | 25.44      |
| Replicate 1 | Ripk2       | 24.82 | 23.18 | 25.32 | 25.59  | 25.12     | 23.35     | 24.94     | 24.88      |
| Replicate 2 | Ripk2       | 24.74 | 23.34 | 25.29 | 25.76  | 24.78     | 23.27     | 24.66     | 24.24      |
| Replicate 1 | Ing3        | 23.60 | 23.11 | 24.06 | 24.34  | 23.97     | 23.12     | 23.59     | 23.77      |
| Replicate 2 | Ing3        | 23.46 | 22.74 | 23.72 | 24.27  | 23.65     | 22.97     | 23.30     | 23.16      |
| Replicate 1 | Tgif1       | 21.77 | 20.28 | 21.98 | 23.54  | 21.71     | 19.96     | 21.15     | 22.04      |
| Replicate 2 | Tgif1       | 22.32 | 20.35 | 21.93 | 23.05  | 21.65     | 20.35     | 21.15     | 22.54      |
| Replicate 1 | Samsn1      | 22.56 | 21.43 | 22.40 | 22.92  | 22.87     | 21.47     | 22.10     | 22.22      |
| Replicate 2 | Samsn1      | 22.61 | 21.39 | 22.32 | 22.94  | 22.76     | 21.42     | 21.99     | 21.60      |
|             | Target name | WT 0h | WT 1h | WT 4h | WT 18h | WT+TAT 0h | WT+TAT 1h | WT+TAT 4h | WT+TAT 18h |
| Replicate 1 | Bactin      | 19.42 | 19.56 | 19.89 | 19.67  | 20.25     | 19.42     | 18.54     | 18.88      |
| Replicate 2 | Bactin      | 19.29 | 19.58 | 19.52 | 19.68  | 19.94     | 19.52     | 19.29     | 19.01      |
| Replicate 1 | Bhlhe40     | 20.55 | 19.94 | 21.04 | 22.43  | 20.79     | 19.69     | 20.10     | 21.45      |

|             |         |       |       |       |       |       |       |       |       |
|-------------|---------|-------|-------|-------|-------|-------|-------|-------|-------|
| Replicate 2 | Bhlhe40 | 21.31 | 19.96 | 21.09 | 22.44 | 21.22 | 19.73 | 20.37 | 21.46 |
|-------------|---------|-------|-------|-------|-------|-------|-------|-------|-------|

|             |                    | <b>RelA fl/fl</b> |                   |                   |                   |                   |                   |                   |                   |
|-------------|--------------------|-------------------|-------------------|-------------------|-------------------|-------------------|-------------------|-------------------|-------------------|
|             |                    | <b>+ TAT</b>      |                   |                   |                   |                   |                   |                   |                   |
|             |                    | <b>18h</b>        |                   |                   |                   |                   |                   |                   |                   |
|             | <b>Target name</b> | <b>RelA fl/fl</b> | <b>RelA fl/fl</b> | <b>RelA fl/fl</b> | <b>RelA fl/fl</b> | <b>RelA fl/fl</b> | <b>RelA fl/fl</b> | <b>RelA fl/fl</b> | <b>RelA fl/fl</b> |
|             |                    | <b>0h</b>         | <b>1h</b>         | <b>4h</b>         | <b>18h</b>        | <b>+ TAT 0h</b>   | <b>+ TAT 1h</b>   | <b>+ TAT 4h</b>   |                   |
| Replicate 1 | B actin            | 19.60             | 18.69             | 18.48             | 18.36             | 19.31             | 18.60             | 19.49             | 17.03             |
| Replicate 2 | B actin            | 19.72             | 18.46             | 18.44             | 18.22             | 19.39             | 19.72             | 19.31             | 16.90             |
| Replicate 1 | Nfkbia             | 19.76             | 18.19             | 20.01             | 21.36             | 20.13             | 19.61             | 20.72             | 20.55             |
| Replicate 2 | Nfkbia             | 19.73             | 17.96             | 20.02             | 21.39             | 20.13             | 20.34             | 20.87             | 20.54             |
| Replicate 1 | Tnfaip3            | 23.08             | 21.16             | 23.36             | 24.81             | 24.75             | 23.40             | 23.50             | 23.19             |
| Replicate 2 | Tnfaip3            | 23.23             | 21.09             | 23.34             | 24.98             | 24.67             | 23.77             | 23.74             | 23.63             |
| Replicate 1 | Gadd45b            | 23.93             | 21.17             | 24.07             | 26.16             | 24.27             | 22.73             | 25.10             | 24.96             |
| Replicate 2 | Gadd45b            | 24.10             | 21.12             | 24.00             | 26.01             | 24.36             | 22.91             | 25.13             | 24.83             |

|             |                    | <b>RelA fl/fl</b> |                   |                   |                   |                   |                   |                   |                   |
|-------------|--------------------|-------------------|-------------------|-------------------|-------------------|-------------------|-------------------|-------------------|-------------------|
|             |                    | <b>+ TAT</b>      |                   |                   |                   |                   |                   |                   |                   |
|             |                    | <b>18h</b>        |                   |                   |                   |                   |                   |                   |                   |
|             | <b>Target name</b> | <b>RelA fl/fl</b> | <b>RelA fl/fl</b> | <b>RelA fl/fl</b> | <b>RelA fl/fl</b> | <b>RelA fl/fl</b> | <b>RelA fl/fl</b> | <b>RelA fl/fl</b> | <b>RelA fl/fl</b> |
|             |                    | <b>0h</b>         | <b>1h</b>         | <b>4h</b>         | <b>18h</b>        | <b>+ TAT 0h</b>   | <b>+ TAT 1h</b>   | <b>+ TAT 4h</b>   |                   |
| Replicate 1 | Bactin             | 18.25             | 17.88             | 17.64             | 17.64             | 19.09             | 17.83             | 17.84             | 20.47             |
| Replicate 2 | Bactin             | 18.15             | 18.29             | 17.76             | 17.53             | 19.44             | 17.95             | 17.99             | 20.51             |
| Replicate 1 | Pim1               | 24.45             | 21.25             | 22.59             | 24.78             | 25.66             | 21.64             | 22.88             | 28.17             |
| Replicate 2 | Pim1               | 24.22             | 21.68             | 22.63             | 24.96             | 25.69             | 21.66             | 22.90             | 28.34             |
| Replicate 1 | Ing3               | 22.98             | 21.87             | 22.99             | 23.40             | 23.94             | 22.14             | 23.96             | 27.37             |
| Replicate 2 | Ing3               | 23.22             | 21.68             | 22.94             | 23.81             | 23.60             | 22.21             | 23.81             | 27.11             |
| Replicate 1 | Bhlhe40            | 20.70             | 19.09             | 19.89             | 21.58             | 21.63             | 19.47             | 20.66             | 25.24             |
| Replicate 2 | Bhlhe40            | 20.45             | 18.51             | 19.89             | 22.14             | 21.47             | 19.21             | 19.97             | 24.74             |

|             |                    | <b>RelA fl/fl</b> |                   |                   |                   |                   |                   |                   |                   |
|-------------|--------------------|-------------------|-------------------|-------------------|-------------------|-------------------|-------------------|-------------------|-------------------|
|             |                    | <b>+ TAT</b>      |                   |                   |                   |                   |                   |                   |                   |
|             |                    | <b>18h</b>        |                   |                   |                   |                   |                   |                   |                   |
|             | <b>Target name</b> | <b>RelA fl/fl</b> | <b>RelA fl/fl</b> | <b>RelA fl/fl</b> | <b>RelA fl/fl</b> | <b>RelA fl/fl</b> | <b>RelA fl/fl</b> | <b>RelA fl/fl</b> | <b>RelA fl/fl</b> |
|             |                    | <b>0h</b>         | <b>1h</b>         | <b>4h</b>         | <b>18h</b>        | <b>+ TAT 0h</b>   | <b>+ TAT 1h</b>   | <b>+ TAT 4h</b>   |                   |
| Replicate 1 | Bactin             | 19.70             | 19.80             | 19.68             | 19.55             | 19.56             | 18.98             | 19.12             | 17.45             |
| Replicate 2 | Bactin             | 19.84             | 19.37             | 19.62             | 19.57             | 18.87             | 18.80             | 19.31             | 18.29             |
| Replicate 1 | Ripk2              | 23.88             | 22.05             | 24.99             | 29.87             | 25.18             | 23.43             | 26.24             | 25.61             |
| Replicate 2 | Ripk2              | 23.88             | 22.61             | 25.02             | 29.72             | 25.18             | 23.43             | 25.98             | 24.74             |

|             |             | ReIA fl/fl | ReIA fl/fl | ReIA fl/fl | ReIA fl/fl | ReIA fl/fl | ReIA fl/fl | ReIA fl/fl | ReIA fl/fl |
|-------------|-------------|------------|------------|------------|------------|------------|------------|------------|------------|
|             | Target name | 0h         | 1h         | 4h         | 18h        | + TAT 0h   | + TAT 1h   | + TAT 4h   | + TAT      |
| Replicate 1 | Bactin      | 18.01      | 17.97      | 17.63      | 17.78      | 18.75      | 17.87      | 17.89      | 20.77      |
| Replicate 2 | Bactin      | 17.99      | 17.87      | 17.74      | 18.02      | 18.77      | 17.82      | 18.04      | 20.94      |
| Replicate 1 | Tgif1       | 20.37      | 19.19      | 19.77      | 21.99      | 21.07      | 19.15      | 20.27      | 25.07      |
| Replicate 2 | Tgif1       | 20.34      | 19.07      | 19.90      | 22.35      | 21.25      | 19.28      | 20.19      | 24.86      |
| Replicate 1 | Samsn1      | 22.19      | 19.99      | 20.41      | 21.55      | 22.89      | 20.17      | 21.15      | 24.37      |
| Replicate 2 | Samsn1      | 22.40      | 19.91      | 20.58      | 21.59      | 22.89      | 20.14      | 21.27      | 24.42      |

## Experiment 2

|             |         | WT 0h | WT 1h | WT 4h | WT 18h | WT+TAT 0h | WT+TAT 1h | WT+TAT 4h | WT+TAT 18h |
|-------------|---------|-------|-------|-------|--------|-----------|-----------|-----------|------------|
| Replicate 1 | Bactin  | 19.13 | 18.26 | 16.97 | 16.05  | 18.48     | 18.58     | 17.10     | 15.81      |
| Replicate 2 | Bactin  | 19.14 | 18.60 | 16.52 | 16.30  | 18.29     | 18.66     | 17.34     | 15.67      |
| Replicate 1 | Nfkbia  | 20.33 | 17.93 | 18.36 | 18.52  | 19.32     | 18.27     | 19.04     | 18.78      |
| Replicate 2 | Nfkbia  | 20.49 | 17.95 | 18.51 | 18.52  | 19.40     | 18.26     | 19.05     | 18.72      |
| Replicate 1 | Tnfaip3 | 23.43 | 21.16 | 21.29 | 22.11  | 23.36     | 21.57     | 21.05     | 22.43      |
| Replicate 2 | Tnfaip3 | 23.63 | 21.41 | 21.49 | 22.00  | 23.66     | 21.68     | 21.30     | 22.37      |
| Replicate 1 | Gadd45b | 23.54 | 20.98 | 21.40 | 22.99  | 22.97     | 21.08     | 22.04     | 23.82      |
| Replicate 2 | Gadd45b | 24.08 | 20.87 | 21.72 | 23.14  | 23.34     | 20.93     | 22.52     | 23.93      |

|             |        | WT 0h | WT 1h | WT 4h | WT 18h | WT+TAT 0h | WT+TAT 1h | WT+TAT 4h | WT+TAT 18h |
|-------------|--------|-------|-------|-------|--------|-----------|-----------|-----------|------------|
| Replicate 1 | Bactin | 19.12 | 17.97 | 17.44 | 17.60  | 18.29     | 17.82     | 17.59     | 17.51      |
| Replicate 2 | Bactin | 18.99 | 17.97 | 17.27 | 17.41  | 17.94     | 17.70     | 17.62     | 18.09      |
| Replicate 1 | Pim1   | 24.31 | 21.36 | 22.64 | 25.08  | 25.09     | 21.17     | 23.06     | 26.24      |
| Replicate 2 | Pim1   | 24.58 | 21.34 | 22.47 | 25.06  | 24.77     | 21.10     | 23.40     | 26.56      |
| Replicate 1 | Ripk2  | 24.86 | 22.30 | 23.71 | 24.86  | 24.49     | 22.06     | 23.94     | 25.13      |
| Replicate 2 | Ripk2  | 24.79 | 22.23 | 24.37 | 24.91  | 23.96     | 23.08     | 23.79     | 24.41      |
| Replicate 1 | Ing3   | 24.59 | 22.17 | 22.90 | 24.11  | 23.35     | 21.92     | 23.33     | 24.68      |
| Replicate 2 | Ing3   | 23.74 | 22.15 | 23.31 | 24.48  | 24.78     | 22.13     | 23.65     | 24.49      |

|             |        | WT 0h | WT 1h | WT 4h | WT 18h | WT+TAT 0h | WT+TAT 1h | WT+TAT 4h | WT+TAT 18h |
|-------------|--------|-------|-------|-------|--------|-----------|-----------|-----------|------------|
| Replicate 1 | Bactin | 18.89 | 17.84 | 17.32 | 18.07  | 18.08     | 17.60     | 17.72     | 17.54      |

|             |        |       |       |       |              |       |       |              |              |
|-------------|--------|-------|-------|-------|--------------|-------|-------|--------------|--------------|
| Replicate 2 | Bactin | 19.56 | 18.19 | 17.37 | 18.11        | 17.97 | 17.69 | 17.94        | 17.77        |
| Replicate 1 | Tgif1  | 21.19 | 19.32 | 19.54 | <b>22.00</b> | 20.65 | 19.00 | <b>19.94</b> | 22.10        |
| Replicate 2 | Tgif1  | 22.04 | 19.25 | 19.67 | <b>22.33</b> | 20.76 | 19.00 | <b>20.07</b> | 22.08        |
| Replicate 1 | Samsn1 | 23.10 | 20.23 | 20.24 | 21.85        | 22.62 | 19.85 | 20.54        | <b>21.33</b> |
| Replicate 2 | Samsn1 | 24.45 | 20.57 | 20.61 | 21.82        | 22.44 | 19.93 | 20.73        | <b>21.71</b> |

|             |                    |              |              |              |               | <b>WT+TAT</b> | <b>WT+TAT</b> | <b>WT+TAT</b> | <b>WT+TAT</b> |
|-------------|--------------------|--------------|--------------|--------------|---------------|---------------|---------------|---------------|---------------|
|             | <b>Target name</b> | <b>WT 0h</b> | <b>WT 1h</b> | <b>WT 4h</b> | <b>WT 18h</b> | <b>0h</b>     | <b>1h</b>     | <b>4h</b>     | <b>18h</b>    |
| Replicate 1 | B actin            | 19.50        | 17.85        | 17.48        | 16.99         | 18.01         | 17.66         | 17.66         | 16.54         |
| Replicate 2 | B actin            | 19.52        | 17.97        | 17.43        | 17.30         | 18.11         | 17.89         | 17.62         | 16.66         |
| Replicate 1 | Bhlhe40            | 21.81        | 18.93        | 18.81        | 20.03         | 19.97         | 18.58         | 18.96         | 20.05         |
| Replicate 2 | Bhlhe40            | 21.61        | 18.93        | 18.90        | 20.12         | 19.72         | 18.58         | 18.93         | 19.94         |

|             |                    |                   |                   |                   |                   |                   |                   |                   | <b>RelA fl/fl</b> |
|-------------|--------------------|-------------------|-------------------|-------------------|-------------------|-------------------|-------------------|-------------------|-------------------|
|             |                    | <b>RelA fl/fl</b> | <b>RelA fl/fl</b> | <b>RelA fl/fl</b> | <b>RelA fl/fl</b> | <b>RelA fl/fl</b> | <b>RelA fl/fl</b> | <b>RelA fl/fl</b> | <b>+ TAT</b>      |
|             | <b>Target name</b> | <b>0h</b>         | <b>1h</b>         | <b>4h</b>         | <b>18h</b>        | <b>+ TAT 0h</b>   | <b>+ TAT 1h</b>   | <b>+ TAT 4h</b>   | <b>18h</b>        |
| Replicate 1 | Bactin             | 18.46             | 18.57             | 17.24             | 16.38             | 17.97             | 18.13             | 17.17             | 17.71             |
| Replicate 2 | Bactin             | 18.36             | 18.64             | 18.11             | 15.93             | 19.21             | 18.44             | 16.47             | 18.90             |
| Replicate 1 | Nfkbia             | 19.59             | 17.98             | 18.56             | 18.35             | 19.37             | 19.26             | 19.32             | 21.91             |
| Replicate 2 | Nfkbia             | 19.68             | 17.95             | 18.61             | 18.37             | 21.96             | 19.30             | 18.70             | 22.30             |
| Replicate 1 | Tnfaip3            | 22.95             | 21.53             | 21.53             | 22.10             | 23.87             | 22.71             | 21.12             | 25.14             |
| Replicate 2 | Tnfaip3            | 23.16             | 21.51             | 21.82             | 22.08             | 24.82             | 22.55             | 23.93             | 25.07             |
| Replicate 1 | Gadd45b            | 23.38             | 21.27             | 22.97             | 22.97             | 22.78             | 21.98             | 21.31             | 25.84             |
| Replicate 2 | Gadd45b            | 23.87             | 21.27             | 22.96             | 23.28             | 26.03             | 22.17             | 24.62             | 26.35             |

|             |                    |                   |                   |                   |                   |                   |                   |                   | <b>RelA fl/fl</b> |
|-------------|--------------------|-------------------|-------------------|-------------------|-------------------|-------------------|-------------------|-------------------|-------------------|
|             |                    | <b>RelA fl/fl</b> | <b>RelA fl/fl</b> | <b>RelA fl/fl</b> | <b>RelA fl/fl</b> | <b>RelA fl/fl</b> | <b>RelA fl/fl</b> | <b>RelA fl/fl</b> | <b>+ TAT</b>      |
|             | <b>Target name</b> | <b>0h</b>         | <b>1h</b>         | <b>4h</b>         | <b>18h</b>        | <b>+ TAT 0h</b>   | <b>+ TAT 1h</b>   | <b>+ TAT 4h</b>   | <b>18h</b>        |
| Replicate 1 | Bactin             | 19.16             | 18.81             | 18.63             | 18.54             | 18.85             | 18.83             | 17.93             | 17.89             |
| Replicate 2 | Bactin             | 18.94             | 18.23             | 19.48             | 18.67             | 19.08             | 19.08             | 18.27             | 17.92             |
| Replicate 1 | Pim1               | 23.82             | 22.62             | 25.04             | 27.45             | 25.05             | 22.96             | 23.19             | 26.00             |
| Replicate 2 | Pim1               | 23.75             | 22.02             | 24.72             | 25.99             | 25.69             | 23.11             | 23.97             | 25.98             |

|  |                    | <b>RelA fl/fl</b> | <b>RelA fl/fl</b> | <b>RelA fl/fl</b> | <b>RelA fl/fl</b> | <b>RelA fl/fl</b> | <b>RelA fl/fl</b> | <b>RelA fl/fl</b> | <b>+ TAT</b> |
|--|--------------------|-------------------|-------------------|-------------------|-------------------|-------------------|-------------------|-------------------|--------------|
|  | <b>Target name</b> | <b>0h</b>         | <b>1h</b>         | <b>4h</b>         | <b>18h</b>        | <b>+ TAT 0h</b>   | <b>+ TAT 1h</b>   | <b>+ TAT 4h</b>   | <b>18h</b>   |

|             |        |       |       |       |       |       |       |       |       |
|-------------|--------|-------|-------|-------|-------|-------|-------|-------|-------|
| Replicate 1 | Bactin | 19.56 | 21.13 | 20.43 | 21.14 | 20.03 | 20.31 | 21.93 | 19.36 |
| Replicate 2 | Bactin | 20.03 | 21.09 | 20.37 | 21.65 | 20.48 | 20.32 | 21.90 | 19.61 |
| Replicate 1 | Ing3   | 24.42 | 24.89 | 25.49 | 26.84 | 25.75 | 24.93 | 26.22 | 25.62 |
| Replicate 2 | Ing3   | 24.44 | 24.58 | 25.31 | 27.68 | 26.08 | 24.95 | 26.25 | 25.71 |

|             |                    | <b>ReIA fl/fl</b> |           |           |            |                 |                 |                 |            |
|-------------|--------------------|-------------------|-----------|-----------|------------|-----------------|-----------------|-----------------|------------|
|             |                    | <b>+ TAT</b>      |           |           |            |                 |                 |                 |            |
|             | <b>Target name</b> | <b>0h</b>         | <b>1h</b> | <b>4h</b> | <b>18h</b> | <b>+ TAT 0h</b> | <b>+ TAT 1h</b> | <b>+ TAT 4h</b> | <b>18h</b> |
| Replicate 1 | Bactin             | 21.08             | 20.31     | 19.48     | 18.30      | 21.11           | 19.94           | 19.97           | 21.36      |
| Replicate 2 | Bactin             | 20.78             | 20.28     | 19.52     | 18.28      | 22.09           | 19.94           | 20.00           | 21.48      |
| Replicate 1 | Ripk2              | 25.95             | 23.16     | 24.93     | 24.33      | 27.43           | 23.88           | 25.07           | 27.37      |
| Replicate 2 | Ripk2              | 25.91             | 22.97     | 25.10     | 24.43      | 26.87           | 24.40           | 25.07           | 27.62      |

|             |                    | <b>ReIA fl/fl</b> |           |           |            |                 |                 |                 |            |
|-------------|--------------------|-------------------|-----------|-----------|------------|-----------------|-----------------|-----------------|------------|
|             |                    | <b>+ TAT</b>      |           |           |            |                 |                 |                 |            |
|             | <b>Target name</b> | <b>0h</b>         | <b>1h</b> | <b>4h</b> | <b>18h</b> | <b>+ TAT 0h</b> | <b>+ TAT 1h</b> | <b>+ TAT 4h</b> | <b>18h</b> |
| Replicate 1 | Bactin             | 19.76             | 19.19     | 18.77     | 18.34      | 19.19           | 18.97           | 17.77           | 17.77      |
| Replicate 2 | Bactin             | 19.73             | 19.01     | 18.79     | 18.39      | 19.10           | 18.90           | 18.10           | 17.57      |
| Replicate 1 | Tgif1              | 21.98             | 20.39     | 21.24     | 22.89      | 20.80           | 20.21           | 20.07           | 21.99      |
| Replicate 2 | Tgif1              | 21.93             | 19.38     | 21.26     | 23.53      | 21.13           | 19.76           | 20.61           | 22.42      |
| Replicate 1 | Samsn1             | 22.99             | 20.73     | 22.10     | 23.25      | 22.31           | 21.02           | 21.89           | 21.86      |
| Replicate 2 | Samsn1             | 22.91             | 20.61     | 21.98     | 23.23      | 22.26           | 21.10           | 21.79           | 22.18      |
| Replicate 1 | Bhlhe40            | 21.04             | 19.83     | 20.28     | 21.64      | 20.21           | 20.10           | 19.35           | 20.78      |
| Replicate 2 | Bhlhe40            | 20.77             | 19.55     | 20.15     | 21.37      | 20.23           | 19.82           | 19.32           | 20.62      |
