# Supplementary material for: NF-κB subunits direct kinetically distinct transcriptional cascades in antigen receptor-activated B cells
Source: PubMed Central journal article supplement (PMC10457194; doi:10.1038/s41590-023-01561-7), 2023-07-31
Supplement: 41590_2023_1561_MOESM9_ESM.pdf [file 41590_2023_1561_MOESM9_ESM.pdf]

**Figure S4e: ChIP-PCR analysis of Rel target genes at 18h after anti-IgM treatment****Experiment 1**

|             | <b>Target Name</b> | <b>Input 18h-neg</b> | <b>Rel 18h-neg</b> | <b>Target Name</b> | <b>Input-target</b> | <b>Rel 18h-target</b> |
|-------------|--------------------|----------------------|--------------------|--------------------|---------------------|-----------------------|
| Replicate 1 | Ppp1ca -ve         | 28.68                | 31.04              | Ppp1ca             | 29.19               | 29.98                 |
| Replicate 2 | Ppp1ca -ve         | 28.68                | 29.14              | Ppp1ca             | 30.43               | 29.53                 |
| Replicate 1 | Nfkbie -ve         | 28.91                | 29.06              | Nfkbie             | 28.68               | 27.40                 |
| Replicate 2 | Nfkbie -ve         | 27.86                | 29.20              | Nfkbie             | 28.99               | 26.97                 |
| Replicate 1 | Ldha -ve           | 28.90                | 30.95              | Ldha               | 30.22               | 29.77                 |
| Replicate 2 | Ldha -ve           | 28.95                | 29.77              | Ldha               | 30.46               | 29.25                 |
| Replicate 1 | Hhex -ve           | 29.89                | 30.80              | Hhex               | 29.67               | 28.39                 |
| Replicate 2 | Hhex -ve           | 29.01                | 29.36              | Hhex               | 29.87               | 28.40                 |
| Replicate 1 | Arip3a -ve         | 30.61                | 34.93              | Arip3a             | 29.08               | 28.25                 |
| Replicate 2 | Arip3a -ve         | 30.06                | 31.17              | Arip3a             | 29.46               | 28.46                 |
| Replicate 1 | Bcl6b -ve          | 32.96                | 34.26              | Bcl6b              | 30.56               | 28.55                 |
| Replicate 2 | Bcl6b -ve          | 32.13                | 31.68              | Bcl6b              | 29.86               | 28.56                 |
| Replicate 1 | Cbx3 -ve           | 30.45                | 30.33              | Cbx3               | 30.30               | 30.43                 |
| Replicate 2 | Cbx3 -ve           | 28.86                | 29.09              | Cbx3               | 31.31               | 30.25                 |
| Replicate 1 | Xrcc -ve           | 31.16                | 30.30              | Xrcc               | 30.18               | 28.55                 |
| Replicate 2 | Xrcc -ve           | 29.51                | 30.72              | Xrcc               | 29.08               | 27.99                 |
| Replicate 1 | Bcl11a1-ve         | 27.90                | 28.19              | Bcl11a1            | 29.04               | 27.31                 |
| Replicate 2 | Bcl11a1-ve         | 28.25                | 28.29              | Bcl11a1            | 29.03               | 26.93                 |
| Replicate 1 | Mki67 -ve          | 27.45                | 28.11              | Mki67              | 29.29               | 26.71                 |
| Replicate 2 | Mki67 -ve          | 27.23                | 28.51              | Mki67              | 29.47               | 26.51                 |

**Experiment 2**

|             | <b>Target Name</b> | <b>Input 18h-neg</b> | <b>Rel 18h-neg</b> | <b>Target Name</b> | <b>Input-target</b> | <b>Rel 18h-target</b> |
|-------------|--------------------|----------------------|--------------------|--------------------|---------------------|-----------------------|
| Replicate 1 | Ppp1ca -ve         | 26.99                | 27.68              | Ppp1ca             | 28.36               | 28.02                 |
| Replicate 2 | Ppp1ca -ve         | 27.00                | 26.65              | Ppp1ca             | 28.50               | 28.73                 |
| Replicate 1 | Nfkbie -ve         | 26.41                | 26.73              | Nfkbie             | 27.97               | 25.85                 |
| Replicate 2 | Nfkbie -ve         | 26.50                | 26.55              | Nfkbie             | 27.34               | 25.73                 |
| Replicate 1 | Ldha -ve           | 26.95                | 27.92              | Ldha               | 27.80               | 27.06                 |
| Replicate 2 | Ldha -ve           | 27.14                | 27.22              | Ldha               | 27.90               | 27.14                 |
| Replicate 1 | Hhex -ve           | 27.87                | 26.19              | Hhex               | 27.87               | 26.71                 |
| Replicate 2 | Hhex -ve           | 27.52                | 26.22              | Hhex               | 27.91               | 26.72                 |
| Replicate 1 | Arip3a -ve         | 28.71                | 28.37              | Arip3a             | 27.68               | 25.98                 |
| Replicate 2 | Arip3a -ve         | 28.96                | 27.88              | Arip3a             | 27.92               | 26.58                 |
| Replicate 1 | Bcl6b -ve          | 32.69                | 31.45              | Bcl6b              | 28.74               | 26.75                 |
| Replicate 2 | Bcl6b -ve          | 30.64                | 29.07              | Bcl6b              | 28.00               | 26.86                 |
| Replicate 1 | Cbx3 -ve           | 27.27                | 28.34              | Cbx3               | 29.64               | 28.98                 |
| Replicate 2 | Cbx3 -ve           | 27.27                | 27.26              | Cbx3               | 30.41               | 28.91                 |
| Replicate 1 | Xrcc -ve           | 28.45                | 28.40              | Xrcc               | 27.88               | 26.18                 |
| Replicate 2 | Xrcc -ve           | 27.53                | 27.20              | Xrcc               | 27.50               | 26.26                 |
| Replicate 1 | Bcl11a1-ve         | 28.12                | 28.48              | Bcl11a1            | 28.93               | 27.61                 |
| Replicate 2 | Bcl11a1-ve         | 28.19                | 28.37              | Bcl11a1            | 28.81               | 27.70                 |
| Replicate 1 | Mki67 -ve          | 27.94                | 28.15              | Mki67              | 29.92               | 27.61                 |
| Replicate 2 | Mki67 -ve          | 27.72                | 28.52              | Mki67              | 29.41               | 27.42                 |
