# Supplementary material for: NF-κB subunits direct kinetically distinct transcriptional cascades in antigen receptor-activated B cells
Source: PubMed Central journal article supplement (PMC10457194; doi:10.1038/s41590-023-01561-7), 2023-07-31
Supplement: 41590_2023_1561_MOESM10_ESM.pdf [file 41590_2023_1561_MOESM10_ESM.pdf]

**Fig S5e: Gene expression analysis of NF- $\kappa$ B target genes in FO and MZ B cells in**

**Experiment 1**

|             | <b>Target Name</b> | <b>Rel KO -<br/>FO 0h</b> | <b>Rel KO -<br/>FO 1h</b> | <b>Rel KO -<br/>FO 4h</b> | <b>Rel KO -<br/>FO 18h</b> |
|-------------|--------------------|---------------------------|---------------------------|---------------------------|----------------------------|
| Replicate 1 | Gapdh              | 21.46                     | 21.34                     | 20.94                     | 19.57                      |
| Replicate 2 | Gapdh              | 21.67                     | 21.42                     | 20.64                     | 19.51                      |
| Replicate 1 | Nfkbia             | 22.22                     | 21.43                     | 22.27                     | 22.71                      |
| Replicate 2 | Nfkbia             | 22.01                     | 21.32                     | 22.14                     | 22.84                      |
| Replicate 1 | Tnfaip3            | 24.31                     | 23.77                     | 25.32                     | 25.89                      |
| Replicate 2 | Tnfaip3            | 24.25                     | 23.89                     | 25.90                     | 26.06                      |
| Replicate 1 | Gadd45b            | 24.36                     | 22.57                     | 25.24                     | 25.84                      |
| Replicate 2 | Gadd45b            | 24.33                     | 22.58                     | 25.31                     | 25.92                      |
| Replicate 1 | Bcl2l1             | 29.52                     | 29.92                     | 28.99                     | 26.61                      |
| Replicate 2 | Bcl2l1             | 29.52                     | 29.74                     | 28.11                     | 26.66                      |

|             | <b>Target Name</b> | <b>WT - FO 0h</b> | <b>WT - FO 1h</b> | <b>WT - FO 4h</b> | <b>WT - FO<br/>18h</b> |
|-------------|--------------------|-------------------|-------------------|-------------------|------------------------|
| Replicate 1 | Gapdh              | 21.65             | 21.95             | 21.26             | 18.27                  |
| Replicate 2 | Gapdh              | 21.79             | 22.32             | 20.53             | 17.90                  |
| Replicate 1 | Nfkbia             | 22.32             | 21.16             | 21.90             | 21.04                  |
| Replicate 2 | Nfkbia             | 22.67             | 21.20             | 21.80             | 20.94                  |
| Replicate 1 | Tnfaip3            | 25.35             | 23.47             | 24.04             | 23.37                  |
| Replicate 2 | Tnfaip3            | 25.31             | 23.47             | 24.49             | 23.14                  |
| Replicate 1 | Gadd45b            | 25.48             | 22.97             | 23.97             | 23.92                  |
| Replicate 2 | Gadd45b            | 25.43             | 22.81             | 23.92             | 24.18                  |
| Replicate 1 | Bcl2l1             | 29.31             | 27.07             | 24.16             | 22.36                  |
| Replicate 2 | Bcl2l1             | 29.35             | 26.95             | 24.07             | 22.28                  |

|             | <b>Target Name</b> | <b>RelA cKO -<br/>FO 0h</b> | <b>RelA cKO -<br/>FO 1h</b> | <b>RelA cKO -<br/>FO 4h</b> | <b>RelA cKO -<br/>FO 18h</b> |
|-------------|--------------------|-----------------------------|-----------------------------|-----------------------------|------------------------------|
| Replicate 1 | Gapdh              | 21.31                       | 21.95                       | 20.69                       | 19.69                        |
| Replicate 2 | Gapdh              | 21.24                       | 21.73                       | 21.03                       | 19.05                        |
| Replicate 1 | Nfkbia             | 22.22                       | 22.18                       | 22.56                       | 22.76                        |
| Replicate 2 | Nfkbia             | 22.13                       | 22.27                       | 22.70                       | 22.66                        |
| Replicate 1 | Tnfaip3            | 26.30                       | 26.95                       | 23.87                       | 25.29                        |
| Replicate 2 | Tnfaip3            | 26.38                       | 27.14                       | 23.68                       | 25.53                        |
| Replicate 1 | Gadd45b            | 25.41                       | 23.66                       | 24.07                       | 25.17                        |
| Replicate 2 | Gadd45b            | 25.51                       | 23.55                       | 24.12                       | 24.83                        |
| Replicate 1 | Bcl2l1             | 29.72                       | 28.46                       | 24.66                       | 23.46                        |
| Replicate 2 | Bcl2l1             | 29.34                       | 28.10                       | 24.40                       | 23.52                        |

|             | <b>Target Name</b> | <b>RelA fl/fl -<br/>FO 0h</b> | <b>RelA fl/fl -<br/>FO 1h</b> | <b>RelA fl/fl -<br/>FO 4h</b> | <b>RelA fl/fl -<br/>FO 18h</b> |
|-------------|--------------------|-------------------------------|-------------------------------|-------------------------------|--------------------------------|
| Replicate 1 | Gapdh              | 20.52                         | 21.40                         | 20.57                         | 19.75                          |

|             |         |       |       |       |       |
|-------------|---------|-------|-------|-------|-------|
| Replicate 2 | Gapdh   | 20.67 | 21.76 | 19.69 | 19.55 |
| Replicate 1 | Nfkbia  | 21.50 | 20.13 | 21.28 | 22.50 |
| Replicate 2 | Nfkbia  | 21.59 | 20.00 | 21.03 | 22.69 |
| Replicate 1 | Tnfaip3 | 25.87 | 22.39 | 23.05 | 25.20 |
| Replicate 2 | Tnfaip3 | 25.84 | 22.46 | 23.18 | 25.22 |
| Replicate 1 | Gadd45b | 24.18 | 21.40 | 22.82 | 25.28 |
| Replicate 2 | Gadd45b | 24.18 | 21.39 | 22.96 | 25.06 |
| Replicate 1 | Bcl2l1  | 27.97 | 24.71 | 23.52 | 23.51 |
| Replicate 2 | Bcl2l1  | 27.85 | 24.88 | 23.45 | 23.91 |

## Experiment 2

|             | Target Name | Rel KO -<br>FO 0h | Rel KO -<br>FO 1h | Rel KO -<br>FO 4h | Rel KO -<br>FO 18h |
|-------------|-------------|-------------------|-------------------|-------------------|--------------------|
| Replicate 1 | Gapdh       | 21.16             | 20.69             | 19.81             | 18.91              |
| Replicate 2 | Gapdh       | 21.28             | 20.90             | 19.51             | 18.93              |
| Replicate 1 | Nfkbia      | 20.68             | 19.28             | 20.76             | 22.12              |
| Replicate 2 | Nfkbia      | 20.60             | 20.41             | 20.78             | 22.14              |
| Replicate 1 | Tnfaip3     | 23.81             | 23.19             | 24.03             | 25.64              |
| Replicate 2 | Tnfaip3     | 23.66             | 22.95             | 24.25             | 25.81              |
| Replicate 1 | Gadd45b     | 23.09             | 22.58             | 23.40             | 25.59              |
| Replicate 2 | Gadd45b     | 23.25             | 22.28             | 23.49             | 25.23              |
| Replicate 1 | Bcl2l1      | 28.28             | 28.80             | 28.14             | 25.86              |
| Replicate 2 | Bcl2l1      | 27.81             | 28.42             | 28.16             | 25.72              |

|             | Target Name | WT - FO 0h | WT - FO 1h | WT - FO 4h | WT - FO<br>18h |
|-------------|-------------|------------|------------|------------|----------------|
| Replicate 1 | Gapdh       | 22.17      | 22.42      | 20.81      | 17.57          |
| Replicate 2 | Gapdh       | 22.14      | 22.45      | 20.96      | 17.57          |
| Replicate 1 | Nfkbia      | 22.06      | 21.23      | 22.18      | 20.23          |
| Replicate 2 | Nfkbia      | 22.55      | 21.05      | 22.11      | 20.11          |
| Replicate 1 | Tnfaip3     | 24.65      | 24.39      | 23.35      | 22.33          |
| Replicate 2 | Tnfaip3     | 24.80      | 23.52      | 23.05      | 21.80          |
| Replicate 1 | Gadd45b     | 25.08      | 23.25      | 23.87      | 23.45          |
| Replicate 2 | Gadd45b     | 25.10      | 23.18      | 23.86      | 23.56          |
| Replicate 1 | Bcl2l1      | 28.75      | 27.64      | 24.00      | 21.58          |
| Replicate 2 | Bcl2l1      | 29.08      | 26.42      | 23.72      | 21.66          |

|             | Target Name | RelA cKO -<br>FO 0h | RelA cKO -<br>FO 1h | RelA cKO -<br>FO 4h | RelA cKO -<br>FO 18h |
|-------------|-------------|---------------------|---------------------|---------------------|----------------------|
| Replicate 1 | Gapdh       | 21.61               | 20.73               | 19.77               | 15.88                |
| Replicate 2 | Gapdh       | 21.74               | 20.78               | 19.74               | 16.06                |
| Replicate 1 | Nfkbia      | 22.96               | 21.92               | 21.12               | 19.11                |
| Replicate 2 | Nfkbia      | 22.81               | 21.26               | 21.11               | 19.17                |
| Replicate 1 | Tnfaip3     | 26.73               | 24.47               | 23.25               | 21.78                |
| Replicate 2 | Tnfaip3     | 26.85               | 24.74               | 23.33               | 21.96                |

|             |         |       |       |       |       |
|-------------|---------|-------|-------|-------|-------|
| Replicate 1 | Gadd45b | 26.32 | 23.76 | 22.78 | 21.48 |
| Replicate 2 | Gadd45b | 25.88 | 23.59 | 22.96 | 22.14 |
| Replicate 1 | Bcl2l1  | 29.15 | 28.18 | 22.40 | 20.63 |
| Replicate 2 | Bcl2l1  | 29.24 | 27.94 | 22.84 | 20.56 |

|             | <b>Target Name</b> | <b>RelA fl/fl -<br/>FO 0h</b> | <b>RelA fl/fl -<br/>FO 1h</b> | <b>RelA fl/fl -<br/>FO 4h</b> | <b>RelA fl/fl -<br/>FO 18h</b> |
|-------------|--------------------|-------------------------------|-------------------------------|-------------------------------|--------------------------------|
| Replicate 1 | Gapdh              | 21.18                         | 20.87                         | 19.24                         | 15.72                          |
| Replicate 2 | Gapdh              | 20.97                         | 20.82                         | 19.21                         | 15.52                          |
| Replicate 1 | Nfkbia             | 21.94                         | 20.20                         | 20.29                         | 18.43                          |
| Replicate 2 | Nfkbia             | 21.79                         | 20.35                         | 20.22                         | 18.43                          |
| Replicate 1 | Tnfaip3            | 25.90                         | 23.32                         | 22.11                         | 21.46                          |
| Replicate 2 | Tnfaip3            | 25.45                         | 23.34                         | 22.05                         | 21.22                          |
| Replicate 1 | Gadd45b            | 25.08                         | 22.63                         | 22.96                         | 22.34                          |
| Replicate 2 | Gadd45b            | 25.29                         | 23.07                         | 22.89                         | 21.72                          |
| Replicate 1 | Bcl2l1             | 26.83                         | 25.82                         | 22.51                         | 19.86                          |
| Replicate 2 | Bcl2l1             | 26.55                         | 25.99                         | 22.11                         | 19.56                          |

**RelA cKO and Rel KO mice**

| <b>Rel KO -<br/>MZ 0h</b> | <b>Rel KO -<br/>MZ 1h</b> | <b>Rel KO -<br/>MZ 4h</b> | <b>Rel KO -<br/>MZ 18h</b> |
|---------------------------|---------------------------|---------------------------|----------------------------|
| 21.30                     | 21.41                     | 21.50                     | 23.43                      |
| 20.76                     | 21.95                     | 20.91                     | 22.87                      |
| 22.81                     | 22.39                     | 23.23                     | 25.98                      |
| 22.67                     | 22.38                     | 23.48                     | 25.76                      |
| 25.79                     | 25.84                     | 25.73                     | 29.46                      |
| 25.69                     | 25.85                     | 26.72                     | 29.02                      |
| 25.29                     | 24.42                     | 26.03                     | 30.46                      |
| 25.31                     | 24.51                     | 25.97                     | 29.45                      |
| 29.95                     | 30.84                     | 29.71                     | 30.49                      |
| 29.40                     | 30.52                     | 29.50                     | 30.63                      |

| <b>WT - MZ<br/>0h</b> | <b>WT - MZ<br/>1h</b> | <b>WT - MZ<br/>4h</b> | <b>WT - MZ<br/>18h</b> |
|-----------------------|-----------------------|-----------------------|------------------------|
| 22.06                 | 22.67                 | 25.95                 | 20.34                  |
| 21.95                 | 22.71                 | 25.81                 | 19.53                  |
| 23.37                 | 22.99                 | 27.89                 | 23.25                  |
| 23.13                 | 23.23                 | 27.74                 | 23.39                  |
| 26.05                 | 25.81                 | 29.92                 | 25.76                  |
| 26.40                 | 25.93                 | 29.18                 | 26.24                  |
| 26.28                 | 24.75                 | 30.17                 | 26.12                  |
| 25.65                 | 24.94                 | 30.23                 | 26.21                  |
| 29.50                 | 29.00                 | 30.50                 | 24.72                  |
| 29.34                 | 28.86                 | 30.74                 | 24.68                  |

| <b>RelA cKO -<br/>MZ 0h</b> | <b>RelA cKO -<br/>MZ 1h</b> | <b>RelA cKO -<br/>MZ 4h</b> | <b>RelA cKO -<br/>MZ 18h</b> |
|-----------------------------|-----------------------------|-----------------------------|------------------------------|
| 22.49                       | 23.43                       | 23.22                       | 28.92                        |
| 22.34                       | 22.80                       | 22.97                       | 27.73                        |
| 24.83                       | 25.35                       | 25.55                       | 31.71                        |
| 24.95                       | 25.04                       | 25.92                       | 29.75                        |
| 28.61                       | 28.50                       | 28.21                       | 32.86                        |
| 28.71                       | 28.20                       | 27.93                       | 32.36                        |
| 26.30                       | 26.17                       | 27.28                       | 32.85                        |
| 26.37                       | 26.23                       | 27.04                       | 33.18                        |
| 30.94                       | 30.63                       | 28.36                       | 31.39                        |
| 30.29                       | 31.20                       | 27.91                       | 31.89                        |

| <b>RelA fl/fl -<br/>MZ 0h</b> | <b>RelA fl/fl -<br/>MZ 1h</b> | <b>RelA fl/fl -<br/>MZ 4h</b> | <b>RelA fl/fl -<br/>MZ 18h</b> |
|-------------------------------|-------------------------------|-------------------------------|--------------------------------|
| 21.91                         | 21.36                         | 21.70                         | 29.16                          |

|       |       |       |       |
|-------|-------|-------|-------|
| 21.82 | 21.42 | 21.64 | 28.75 |
| 23.40 | 22.51 | 23.97 | 29.67 |
| 23.72 | 22.46 | 23.98 | 28.90 |
| 25.10 | 24.98 | 25.68 | 31.31 |
| 26.03 | 25.28 | 25.83 | 31.58 |
| 26.29 | 27.75 | 26.12 | 32.44 |
| 26.12 | 27.70 | 26.11 | 32.64 |
| 30.06 | 27.96 | 26.10 | 31.88 |
| 30.70 | 27.58 | 26.14 | 33.20 |

| <b>Rel KO -<br/>MZ 0h</b> | <b>Rel KO -<br/>MZ 1h</b> | <b>Rel KO -<br/>MZ 4h</b> | <b>Rel KO -<br/>MZ 18h</b> |
|---------------------------|---------------------------|---------------------------|----------------------------|
| 21.60                     | 20.77                     | 19.20                     | 24.87                      |
| 21.55                     | 20.44                     | 19.08                     | 25.04                      |
| 21.72                     | 22.31                     | 22.94                     | 27.28                      |
| 21.28                     | 21.89                     | 22.94                     | 28.50                      |
| 24.39                     | 24.71                     | 24.66                     | 30.79                      |
| 24.36                     | 25.13                     | 24.75                     | 30.98                      |
| 24.93                     | 24.32                     | 24.51                     | 30.19                      |
| 24.75                     | 24.45                     | 24.55                     | 31.29                      |
| 30.01                     | 29.65                     | 28.19                     | 32.89                      |
| 29.54                     | 29.85                     | 28.33                     | 34.21                      |

| <b>WT - MZ<br/>0h</b> | <b>WT - MZ<br/>1h</b> | <b>WT - MZ<br/>4h</b> | <b>WT - MZ<br/>18h</b> |
|-----------------------|-----------------------|-----------------------|------------------------|
| 22.47                 | 22.34                 | 21.46                 | 23.25                  |
| 22.67                 | 22.06                 | 21.77                 | 23.53                  |
| 23.32                 | 23.71                 | 24.61                 | 25.81                  |
| 23.25                 | 23.64                 | 24.56                 | 25.50                  |
| 25.26                 | 25.83                 | 25.92                 | 28.98                  |
| 24.88                 | 25.53                 | 25.76                 | 28.56                  |
| 26.21                 | 25.41                 | 26.90                 | 29.25                  |
| 25.98                 | 25.55                 | 26.36                 | 29.00                  |
| 30.27                 | 30.14                 | 26.91                 | 27.51                  |
| 29.92                 | 29.43                 | 26.97                 | 27.57                  |

| <b>RelA cKO -<br/>MZ 0h</b> | <b>RelA cKO -<br/>MZ 1h</b> | <b>RelA cKO -<br/>MZ 4h</b> | <b>RelA cKO -<br/>MZ 18h</b> |
|-----------------------------|-----------------------------|-----------------------------|------------------------------|
| 20.47                       | 21.02                       | 20.59                       | 28.69                        |
| 20.33                       | 20.95                       | 20.59                       | 27.57                        |
| 22.76                       | 22.93                       | 22.94                       | 30.70                        |
| 22.59                       | 22.67                       | 22.41                       | 29.91                        |
| 26.34                       | 26.37                       | 25.59                       | 30.79                        |
| 26.52                       | 26.46                       | 26.06                       | 32.83                        |

|       |       |       |       |
|-------|-------|-------|-------|
| 25.07 | 24.33 | 25.18 | 33.22 |
| 25.47 | 24.87 | 25.23 | 32.15 |
| 28.84 | 29.65 | 25.32 | 31.74 |
| 28.76 | 28.98 | 25.28 | 30.80 |

| <b>RelA fl/fl -</b> | <b>RelA fl/fl -</b> | <b>RelA fl/fl -</b> | <b>RelA fl/fl -</b> |
|---------------------|---------------------|---------------------|---------------------|
| <b>MZ 0h</b>        | <b>MZ 1h</b>        | <b>MZ 4h</b>        | <b>MZ 18h</b>       |
| 20.77               | 20.05               | 19.44               | 28.30               |
| 20.83               | 20.08               | 19.54               | 29.40               |
| 21.94               | 20.92               | 21.51               | 29.88               |
| 21.95               | 21.10               | 21.50               | 29.07               |
| 25.20               | 23.80               | 23.49               | 31.40               |
| 25.18               | 23.90               | 23.59               | 30.36               |
| 24.70               | 23.78               | 24.88               | 31.81               |
| 24.84               | 23.19               | 24.14               | 31.83               |
| 27.71               | 26.65               | 24.75               | 32.22               |
| 27.74               | 26.83               | 24.72               | 33.20               |
